# Supplementary material for: MEK inhibition enhances presentation of targetable MHC-I tumor antigens in mutant melanomas
Source: PubMed Central journal article supplement — Proc Natl Acad Sci U S A. 2022 Dec 1;119(49):e2208900119. doi: 10.1073/pnas.2208900119 (PMC9894220; doi:10.1073/pnas.2208900119), 2022-12-01
Supplement: pnas.2208900119.sapp.pdf [file pnas.2208900119.sapp.pdf]

# **MEK inhibition enhances presentation of targetable MHC-I tumor antigens in mutant melanomas**

Stopfer & Rettko et al.

## **SI Appendix**

*This file contains:*

Supplementary Figures & legends

Supplementary Methods

Supplementary References

Supplementary Data legends

Supplementary Tables & legends

## SUPPLEMENTARY FIGURES

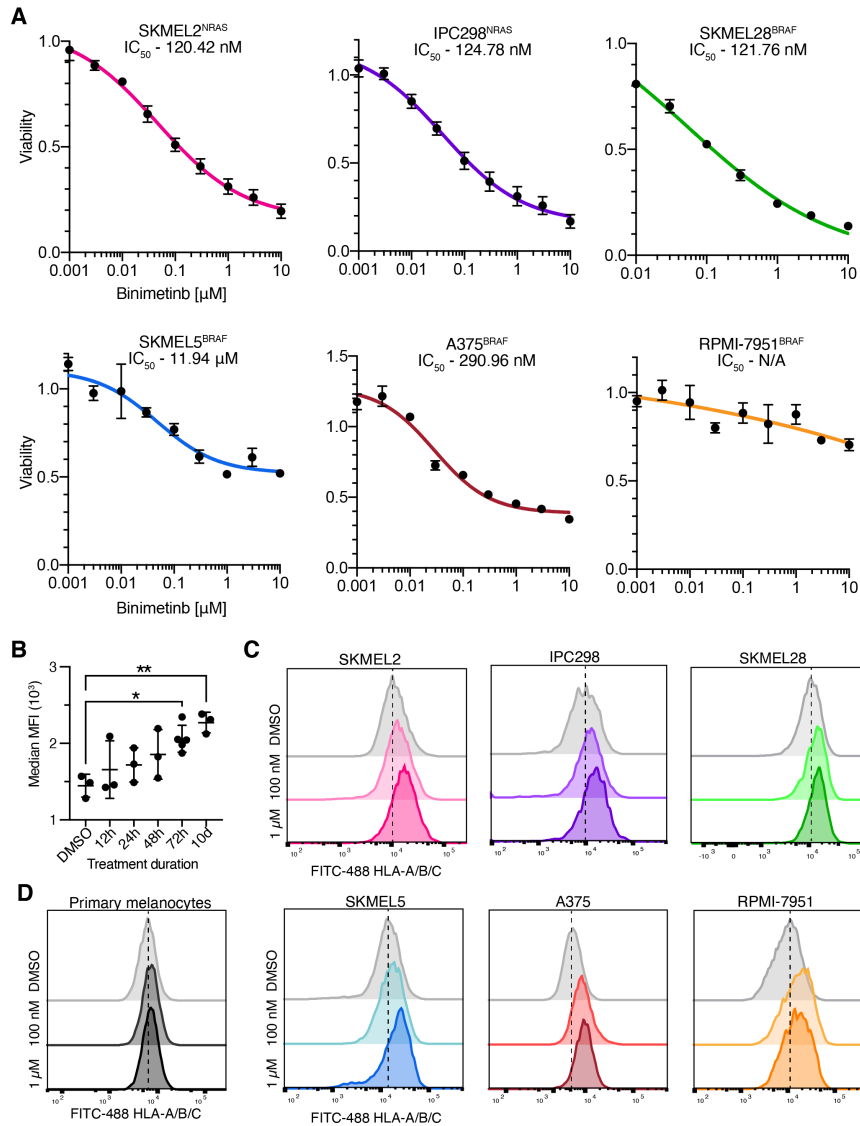

**Fig. S1. Phenotypic characterization of cellular response to binimetinib.**

**(A)** Cell viability (fraction of DMSO control) at 72 hr after binimetinib treatment. Data are represented as mean values  $\pm$  SD for  $n=3$  replicates. Lines represent a four-parameter nonlinear regression curve fit. **(B)** Surface HLA expression of SKMEL5 cells treated with 100 nM binimetinib measured by flow cytometry. Data are represented as mean values  $\pm$  SD for  $n=3$  replicates and significance between replicates ( $*p<0.05$ ,  $**p<0.01$ ) is calculated using a one-way ANOVA test comparing each value to the DMSO control. **(C)-(D)** Flow cytometry measurements of surface HLA expression in cells after 72 hours of treatment with DMSO, 100 nM MEKi, or 1  $\mu$ M MEKi. Data are represented as % of maximum signal, and the distributions are representative of three independent experiments.

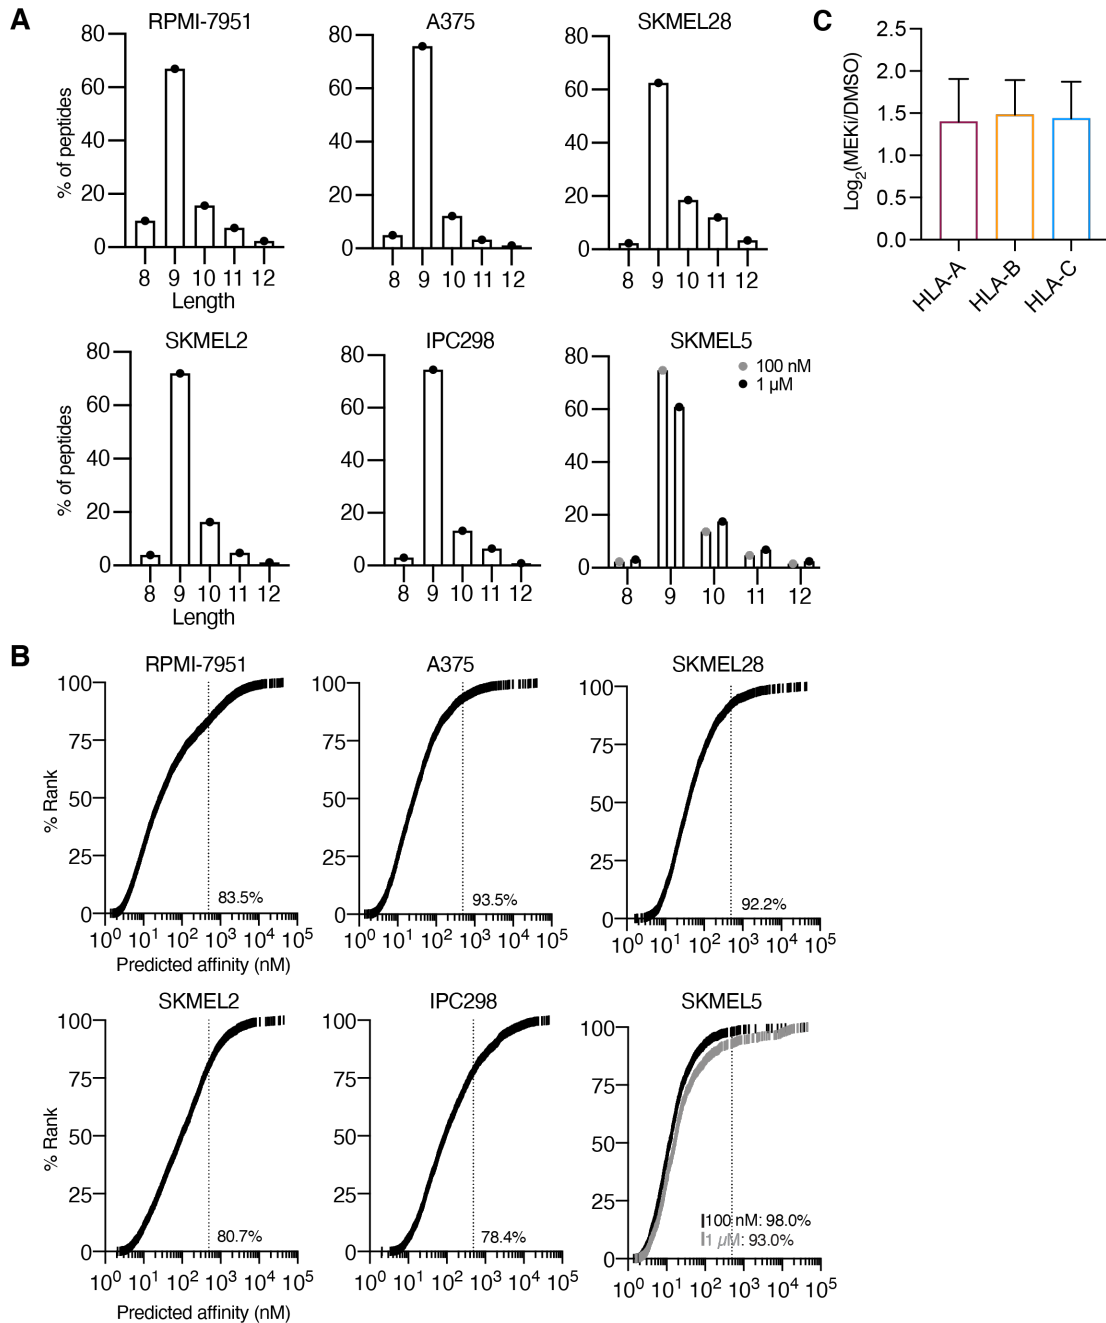

**Fig. S2. MHC peptide characterization from *in vitro* analyses.**

**(A)** Peptide length distribution for each cell line from multiplexed mass spectrometry analyses where  $n=3$  biological replicates were treated with either DMSO or MEKi. **(B)** Predicted binding affinity of 9-mer peptides, rank ordered. Dotted line represents threshold for binding at  $\leq 500$  nM. Percentage of peptides  $\leq 500$  nM are listed on each plot. **(C)** Average fold change in presentation for SKMEL5 9-mers +/- 1  $\mu$ M MEKi segregated by highest predicted affinity to HLA-A/B/C. Error bars represent +/- standard deviation. Tukey's multiple comparisons test shows no significant difference between pairwise comparisons.

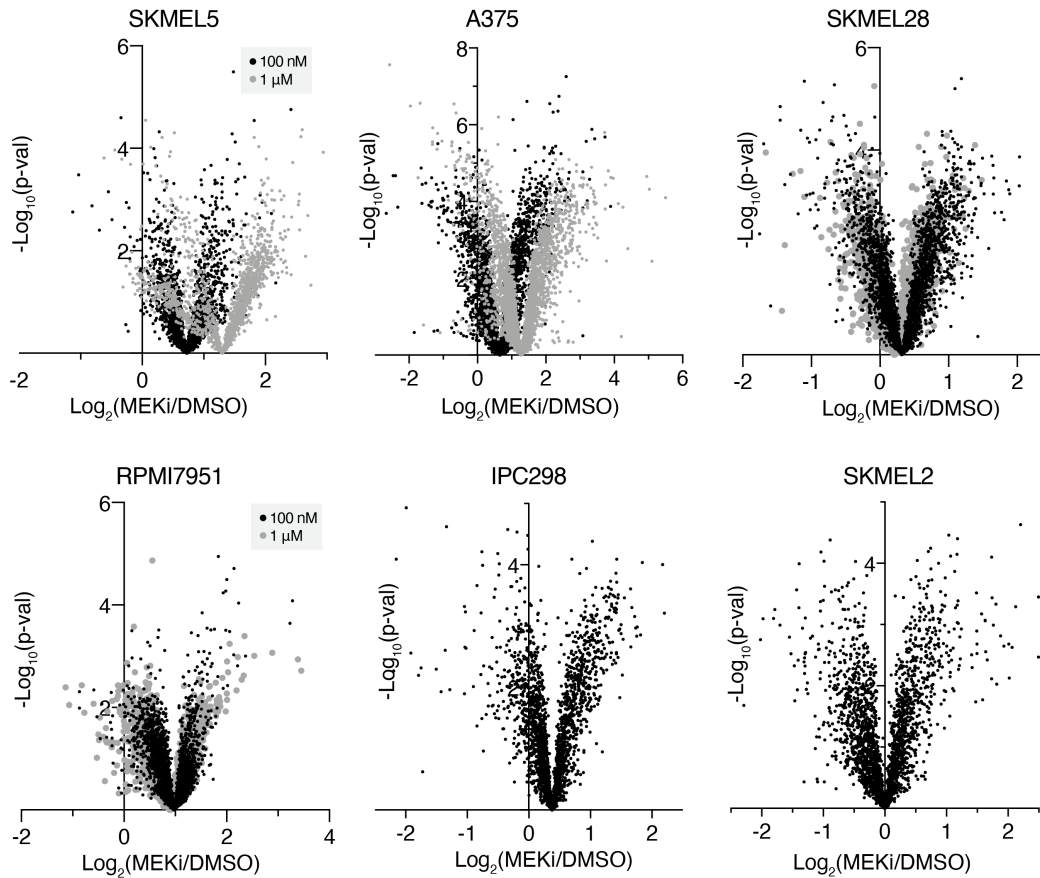

**Fig. S3 Volcano plots of *in vitro* pMHC analyses.**

Volcano plots of the average fold change in pMHC expression with binimetinib treatment (n=3 biological replicates for DMSO and MEKi treated cells) versus significance (mean-adjusted p value, unpaired two-sided t test).

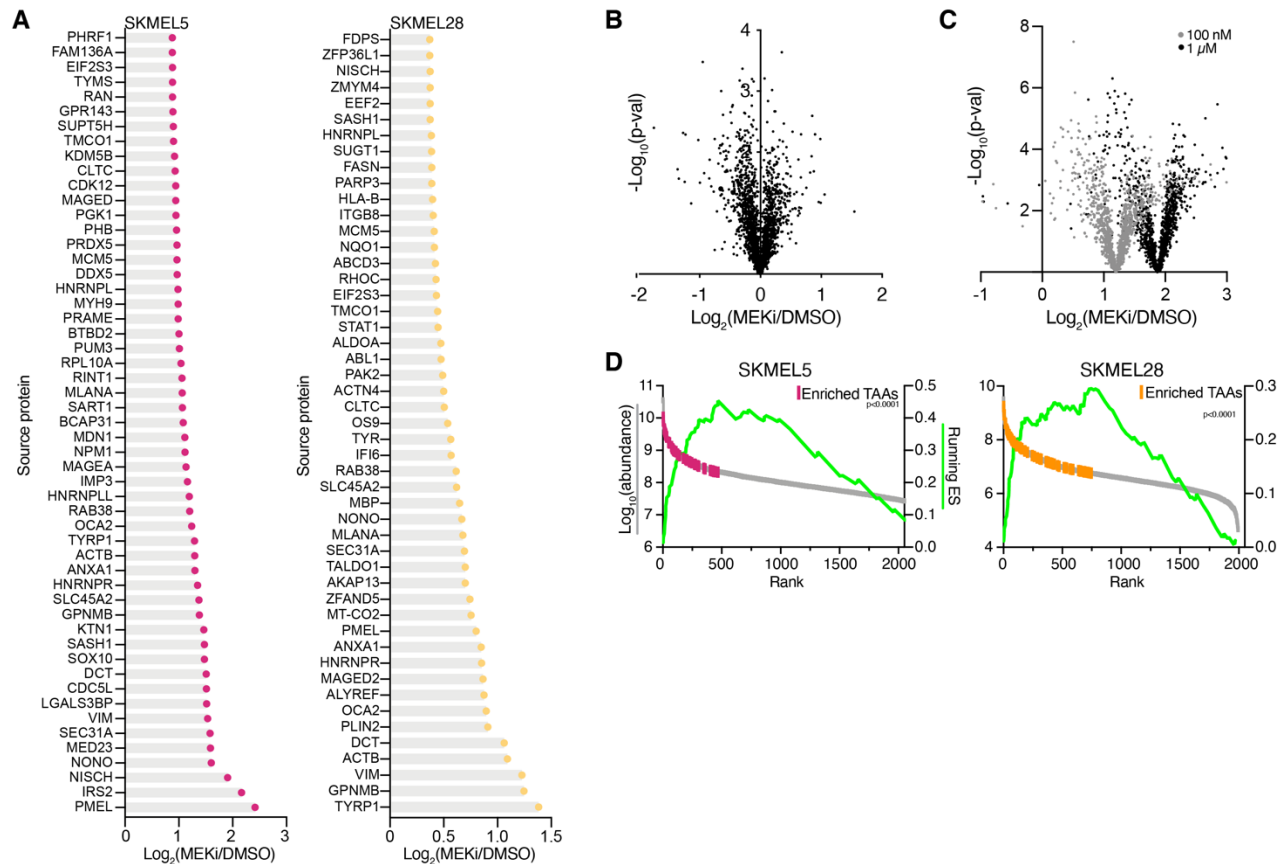

**Fig. S4 TAA pMHC enrichment following binimetinib treatment.**

**(A)** Enriched TAA pMHC expression changes with 100 nM MEKi. **(B)-(C)** Volcano plots of the average fold change in pMHC expression with 10 nM binimetinib treatment **(B)** and 100 nM and 1  $\mu$ M trametinib treatment **(C)**. Data shown are the mean of  $n=3$  biological replicates per condition versus significance (mean-adjusted p value, unpaired two-sided t test). **(D)** Enrichment plots with peptides rank ordered by precursor ion abundance.  $p<0.0001$  for both SKMEL5 100 nM and SKMEL28 100 nM analyses.

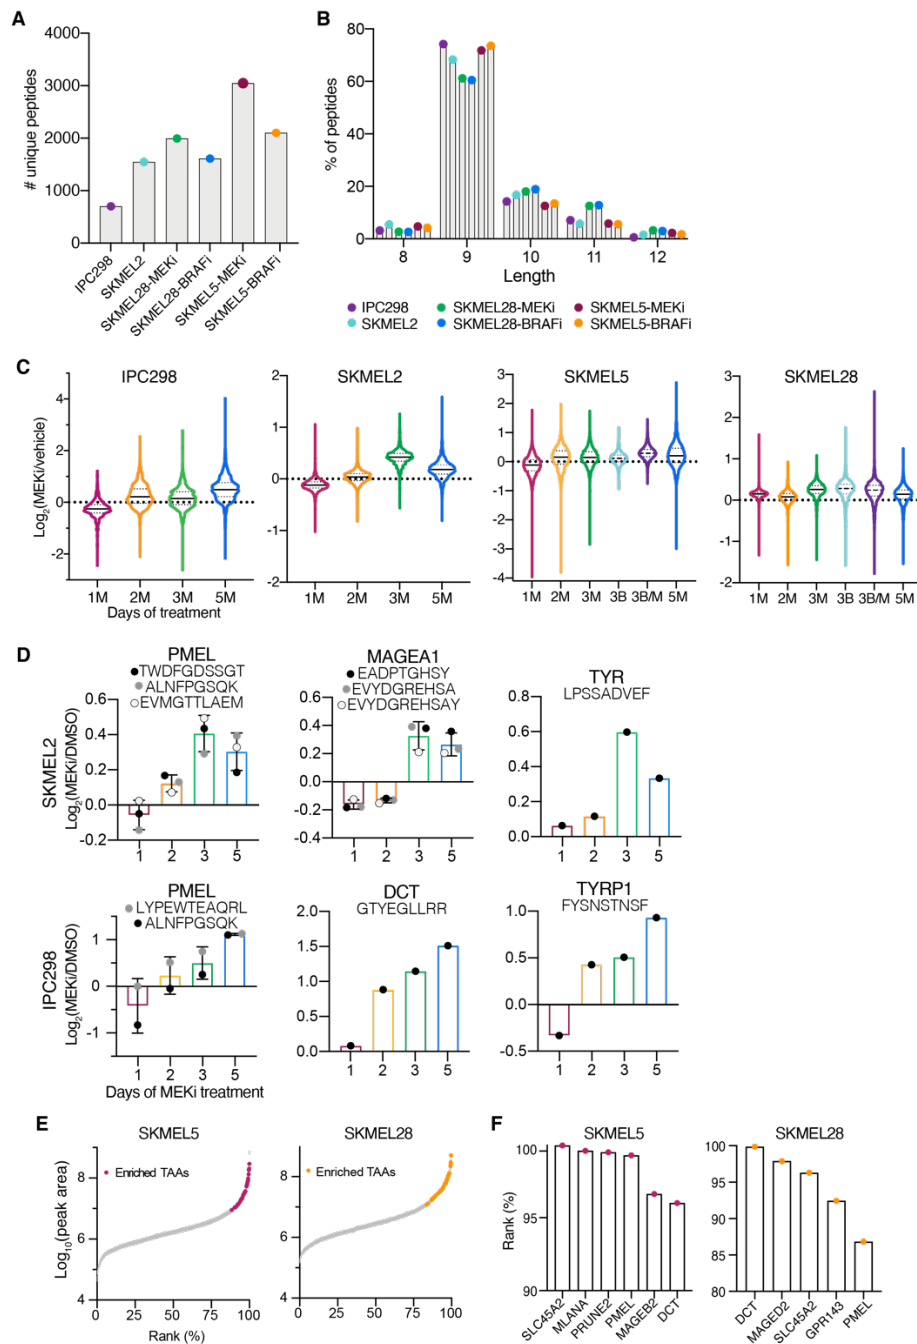

**Fig. S5 TAA enrichment following MEKi treatment *in vivo*.**

**(A)** Number of unique pMHCs identified in each analysis. **(B)** Length distribution of pMHCs represented as a percentage of the total pMHCs identified. **(C)** Violin plot of distribution of fold changes in presentation of pMHCs following MEK inhibition (M, binimetinib), BRAF inhibition (B, encorafenib) or both (B/M). Solid line represents median, dotted lines define the first and third quartiles. **(D)** Changes in pMHC expression for select melanoma differentiation antigens, x-axis = number of days of binimetinib treatment. Errors bars represent standard deviation when >1 peptide from each source protein was identified. **(E)** Rank-ordered average abundance ( $n=3$  biological replicates) of pMHCs in SKMEL5 and SKMEL28 analyses. Positively enriched TAAs are highlighted in color. **(F)** Select TAA peptide rank-ordered average abundance for CLXs.

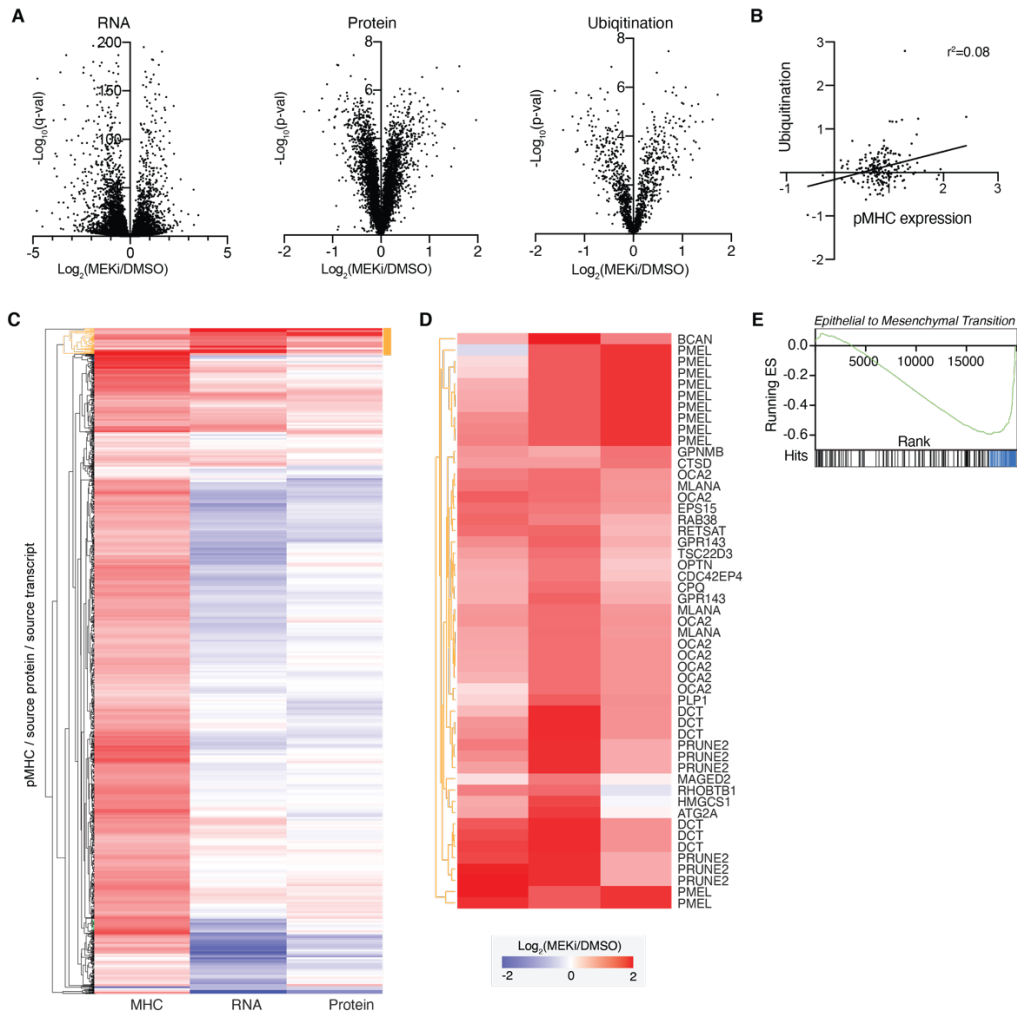

**Fig. S6 Correlation between pMHC, protein, and transcript expression with MEKi treatment.**

**(A)** Volcano plots of changes in RNA and protein expression, and abundance of ubiquitylated peptides. The y-axis represents significance values. Significance: RNA: Wald test, Benjamini Hochberg adjusted. Protein/Ubiquitination: unpaired two-sided T-test. **(B)** Correlation between pMHC expression and ubiquitination levels in SKMEL5 cells +/- 100 nM MEKi. Values represent  $\text{Log}_2(\text{MEKi/DMSO})$ . **(C)-(D)** Hierarchical clustering of pMHC, RNA, and protein expression, represented as the change in expression following 100 nM MEKi. **(D)** displays subcluster highlighted in orange in **(C)**. **(E)** Enrichment plot of EMT genes using for RNA-seq data, SKMEL5 cells +/- 100 nM binimetinib. p & q-values < 0.0001.

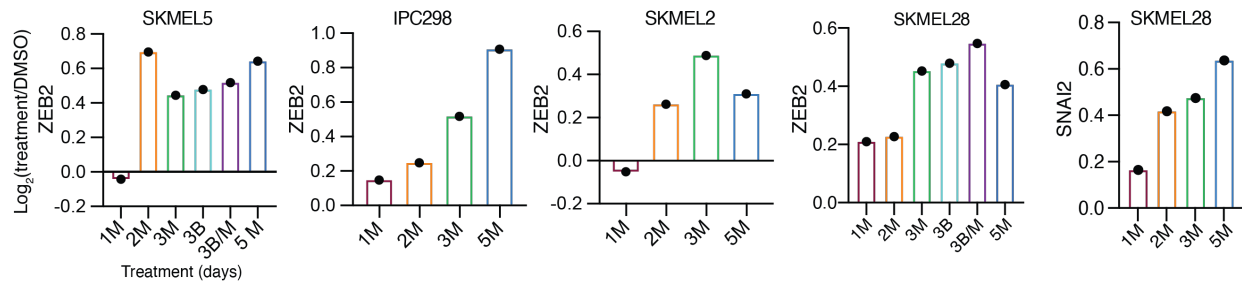

**Fig. S7 pMHC presentation changes in EMT-derived epitopes.**

Maximum change in expression of pMHCs derived from ZEB2 and SNAI2 source proteins from CLX analyses. X-axis describes days of therapy and drug treatment (M=MEKi, binimetinib and B=BRAFi, encorafenib).

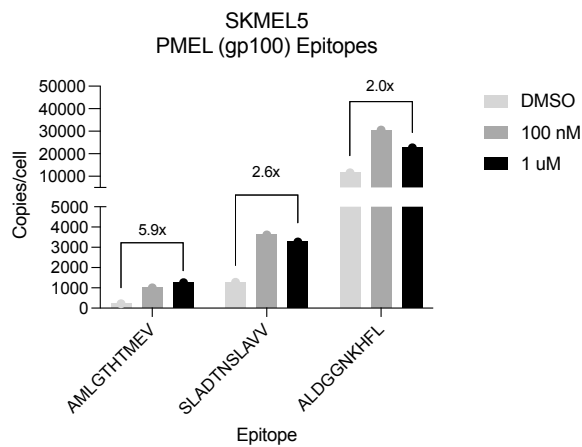

**Fig. S8 PMEL-derived epitopes on SKMEL5 cells.**

Copies-per-cell estimations of three HLA-A\*02:01 PMEL-derived epitopes treated with DMSO or 100 nM/1uM binimetinib for 72 hours.



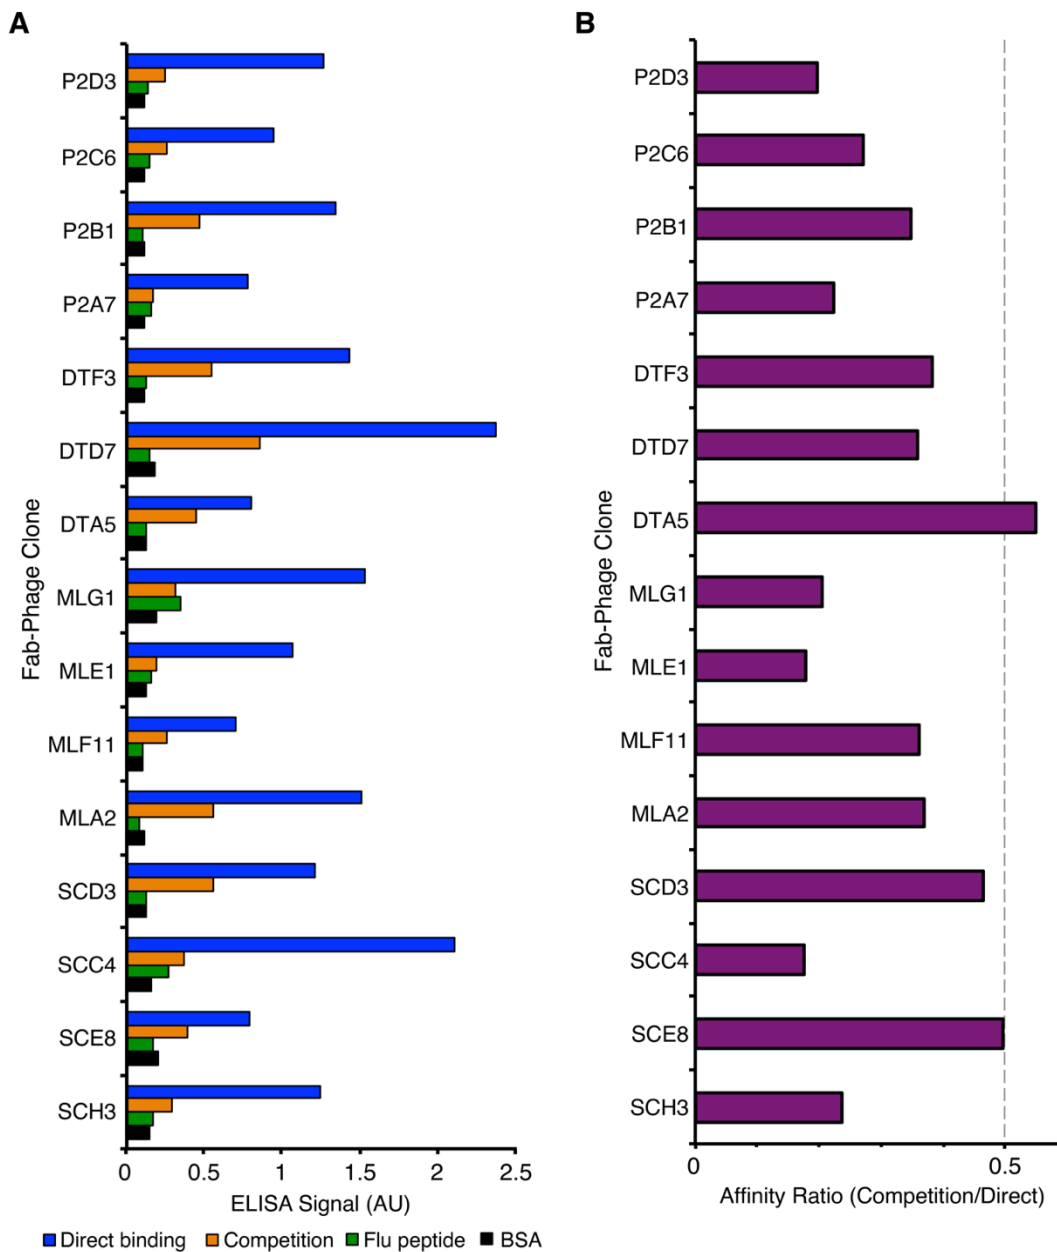

**Fig. S9 Characterization of Fab-phage clones.**

**(A)** Fab-phage ELISA screen of each MHC-peptide complex. Clones with signal above 0.5 AU and competition ratios less than 0.5 were considered high affinity, with predicted relative affinities of <20 nM. Passing clones (green) were further evaluated for binding to the FLU MHC-peptide complex and sequenced. **(B)** ELISA values for all unique Fab-phage clones across all phage-display selections for MHC-peptide complexes.

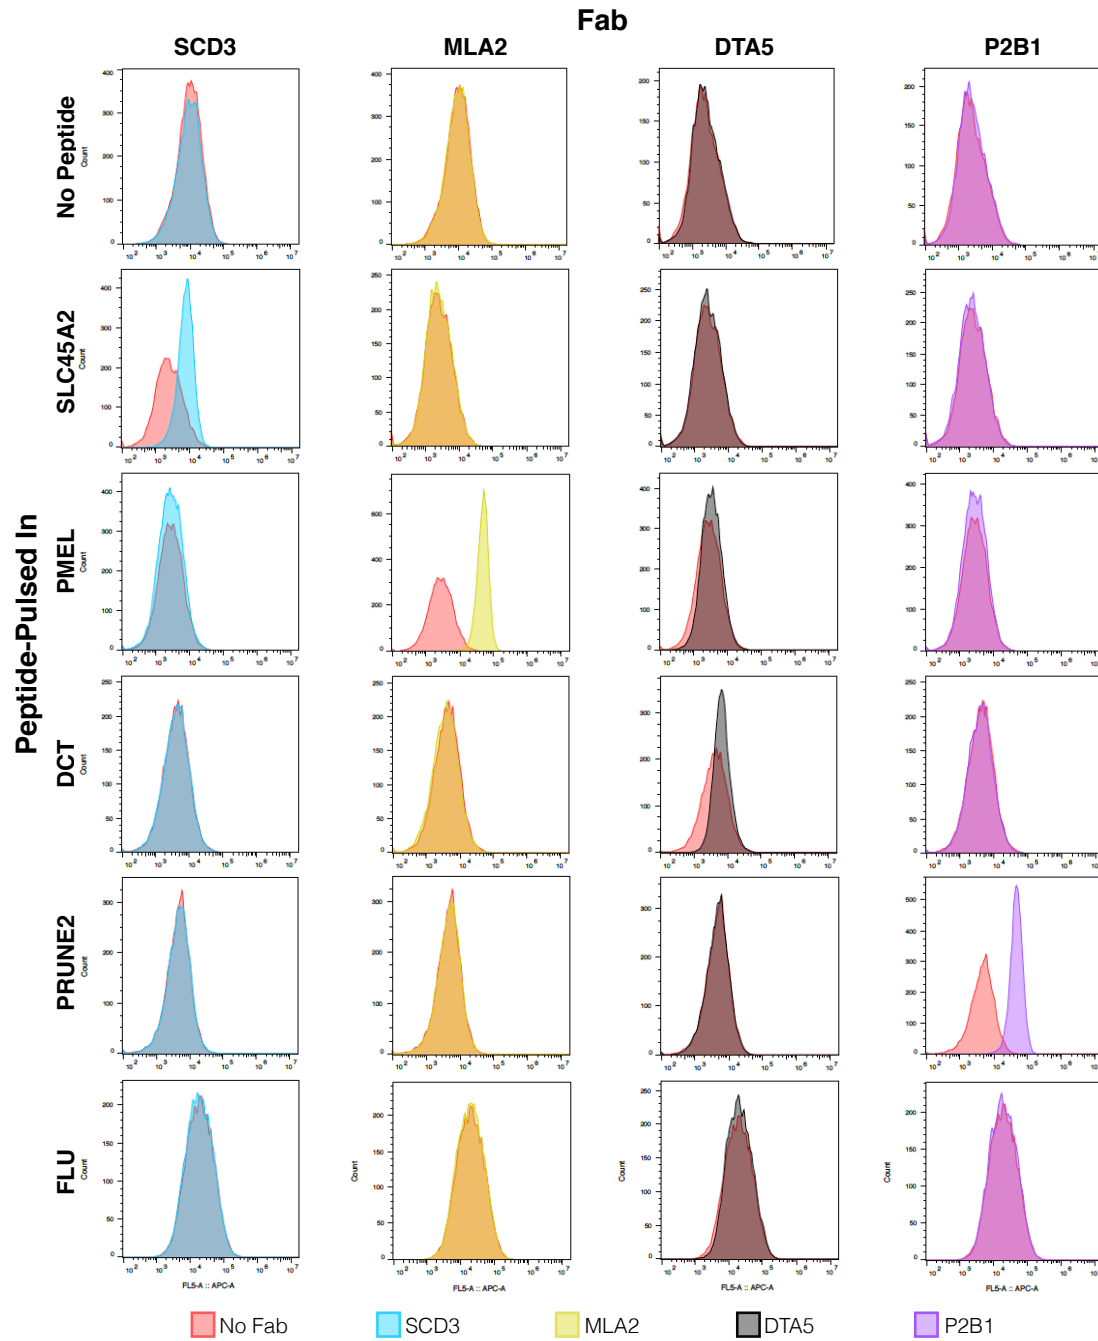

**Fig. S10 Peptide specificity of pMHC-specific Fabs.**

Fluorescence intensity of T2 cells loaded with no peptide (negative control), a decoy FLU peptide, or peptide of interest stained with a pMHC-specific Fab.

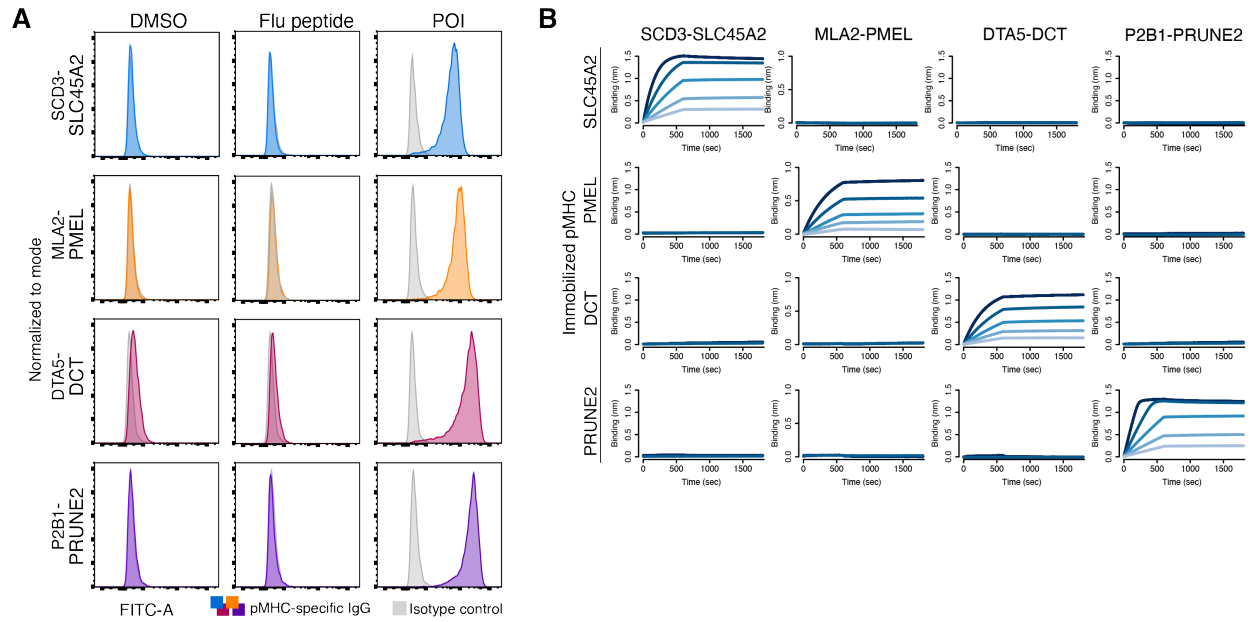

**Fig. S11 Peptide specificity of pMHC-specific IgGs.**

**(A)** Fluorescence intensity of T2 cells loaded with DMSO (negative control), a decoy FLU peptide, or peptide of interest (POI) stained with a pMHC-specific IgG (color) or an isotype control (grey). **(B)** Bio-layer interferometry (BLI) analysis of IgG's (two-fold dilutions starting at 20 nM) against selected HLA-A\*02:01 MHC-peptide complexes.

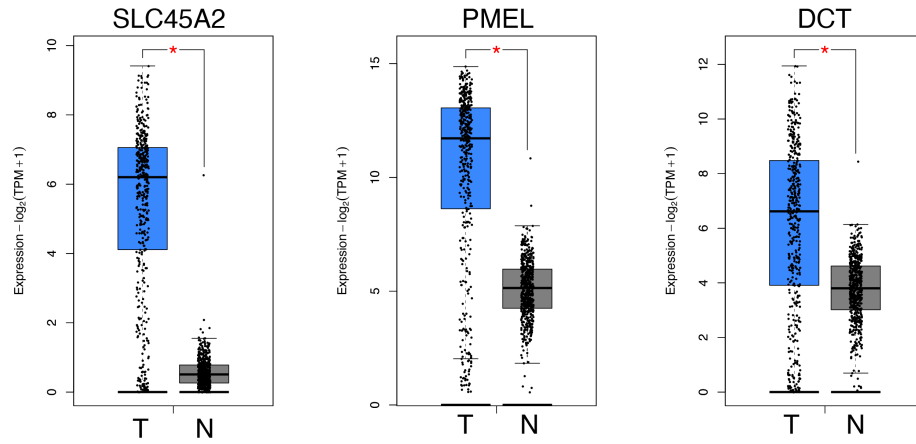

**Fig. S12 Tumor versus normal gene expression profiles of select TAAs.**

Gene Expression profiles (RNA-seq) in skin cutaneous melanoma for n=461 tumors (T, TCGA) and n=558 normal tissues (N, GTEX). \*p ≤ 0.01, one way ANOVA.

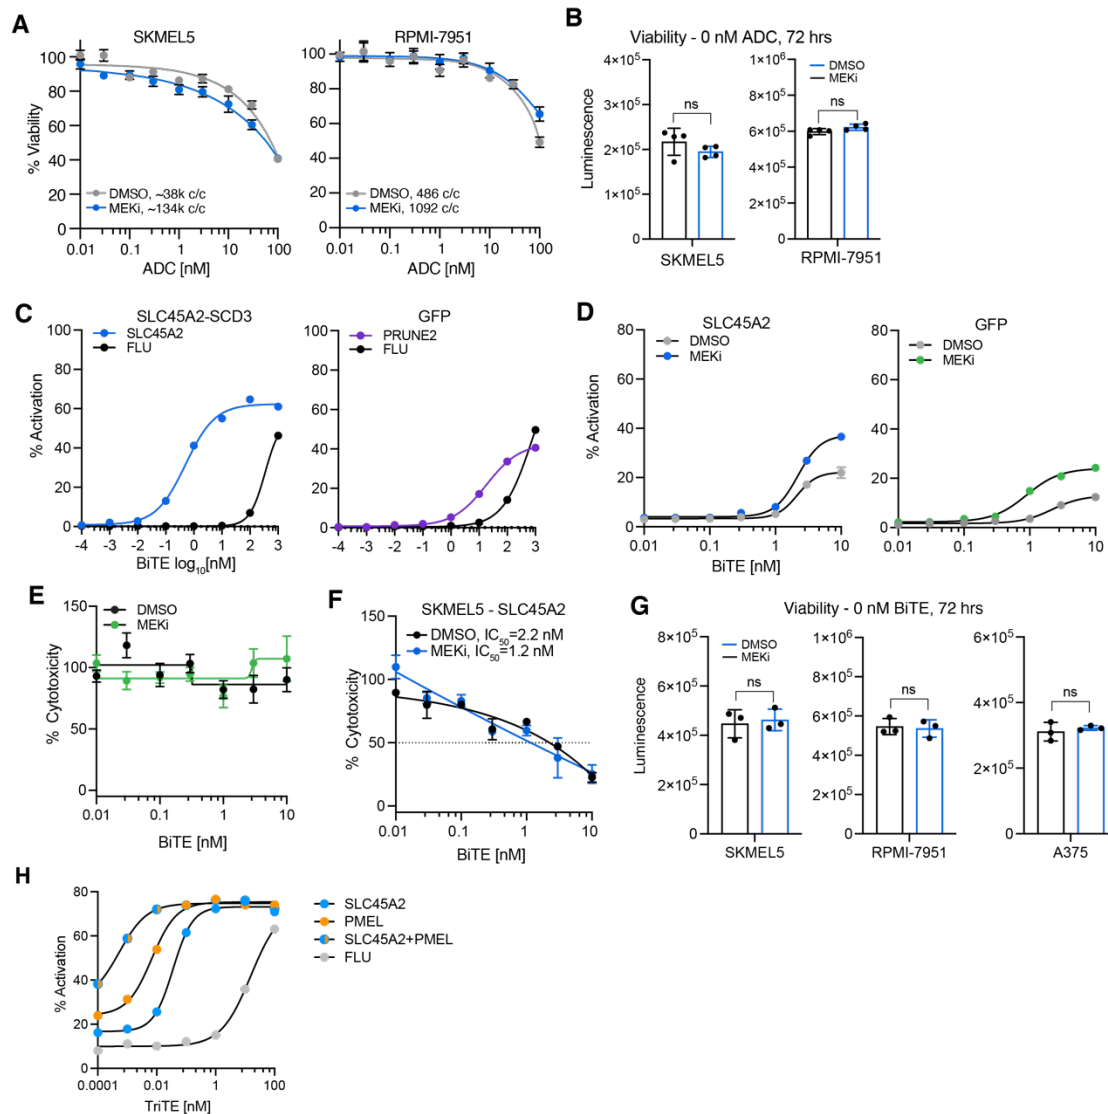

**Fig. S13 Characterization of pMHC-specific ADCs and BiTEs *in vitro*.**

**(A)** Cell viability after 72 hr incubation with SLC45A2-ADC. Error bars represent  $\pm$  SD for  $n=4$  biological replicates. Lines represent a four parameter logistic (4PL) nonlinear regression curve. *c/c* denotes average copies per cell. **(B, G)** Luminescence readout from Cell Titer Glo assay following 72 hours of 0 nM ADC **(B)** or 0 nM BiTE **(G)** treatment of cells pre-treated with DMSO or MEKi. "ns" denotes no significance, paired, two-tailed t-test.

**(C-D)** Percent of GFP+ Jurkat cells following incubation with peptide-pulsed T2 cells **(C)** or SKMEL5 cells **(D)** and a pMHC-specific BiTE or negative control BiTE (anti-GFP) for 24 hours. **(E)** Cell viability (percentage of untreated control) of target cells incubated with normal human T cells (effector:target 2:1) & a negative control anti-GFP BiTE for 48 hours. **(F)** Cell viability (percentage of untreated control) of target cells incubated with normal human T cells (effector:target 2:1) & a pMHC-specific BiTE or 48 hours. **(H)** Percent GFP+ Jurkat cells following incubation with Peptide-pulsed T2 cells and TriTEs for 24 hours.

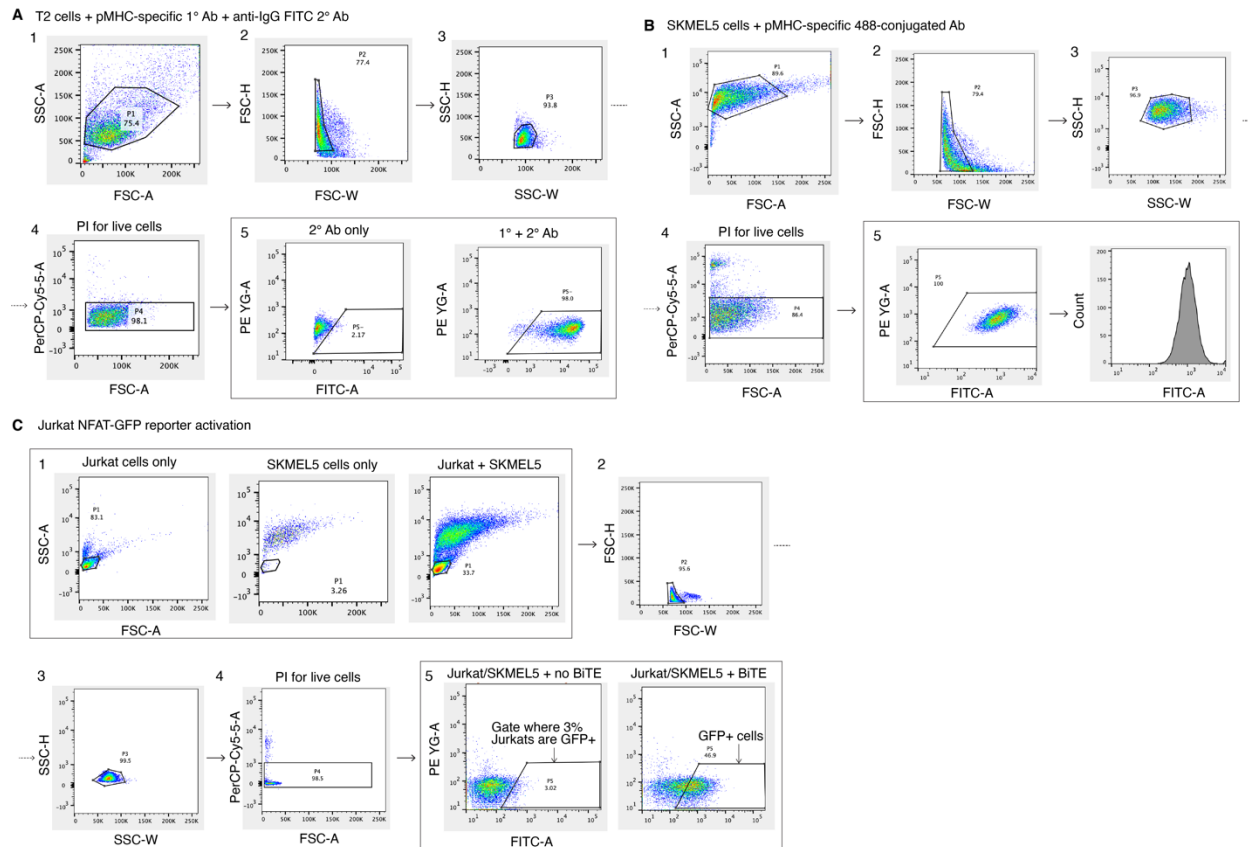

**Figure S14 Flow cytometry gating strategies.**

Flow cytometry gating strategies for **(A)** Peptide-loaded T2 cells + pMHC-specific 1° Ab plus anti-IgG 2° Ab, **(B)** SKMEL5 cells + pMHC-specific Alexa Fluor 488-conjugated Ab, and **(C)** Jurkat NFAT-GFP reporter activation assays.

## SUPPLEMENTARY METHODS

### Peptide synthesis

Heavy leucine-containing peptides for hipMHC quantification correction (ALNEQIARL<sup>+7</sup>, SLPEEIGHL<sup>+7</sup>, and SVVESVKFL<sup>+7</sup>) were synthesized at the MIT-Koch Institute Swanson Biotechnology Center in Biopolymers and Proteomics Facility using standard Fmoc chemistry using an Intavis model MultiPep peptide synthesizer with HATU activation and 5  $\mu$ mol chemistry cycles as previously described.<sup>(1)</sup> Standard Fmoc amino acids were procured from NovaBiochem and Fmoc-Leu (13C6, 15N) was obtained from Cambridge Isotope Laboratories. Light peptides for pMHC-antibody generation (PMEL, DCT, PRUNE2, SLC45A2) were synthesized on a Gyros-Protein Technologies Tribute with UV feedback at a 100 micromole scale using standard Fmoc chemistry and HATU/NMM activation chemistry. Both light and heavy leucine-containing peptides were purified on a Gilson GX-271 preparative HPLC system by reverse phase, and quality assured with MS on a Bruker MicroFlex MALDI-TOF and by RP-HPLC on an Agilent model 1100 HPLC.

Isotopologue peptides for SureQuant-IsoMHC analyses were synthesized using HeavyPeptide AQUA Custom Synthesis Service (Thermo Fisher Scientific) and were purified to >97% and validated with amino acid analysis as previously described<sup>(2)</sup>.

### UV-mediated peptide exchange for hipMHCs

UV-mediated peptide exchange was performed using recombinant, biotinylated Flex-T HLA-A\*02:01 monomers (BioLegend), using a modified version of the commercial protocol. Briefly, 2-4  $\mu$ L of 500  $\mu$ M peptide stock, 2  $\mu$ L of Flex-T monomer, and 32  $\mu$ L of 1X PBS were combined in a 96-well U bottom plate. On ice, plates were illuminated with ultraviolet light (365 nm) for 30 minutes, followed by a 30-minute incubation at 37 °C protected from light. Concentration of stable complexes following peptide exchange was quantified using the Flex-T HLA class I ELISA assay (BioLegend) per manufacturer's instructions for HLA-A\*02:01. ELISA results were acquired using a Tecan plate reader Infinite 200 with Tecan icontrol version 1.7.1.12.

### Peptide MHC binding affinity

Binding affinity of 9-mer pMHCs was estimated using NetMHCpan-4.0 against each cell line's allelic profile (SI Appendix, **Table S1**)<sup>(3, 4)</sup>. The minimum predicted affinity (nM) of each peptide was used to assign peptides to their best predicted allele. The threshold for binding was set to 500 nM.

### Flow cytometry

#### *Surface HLA expression in melanoma cells*

Cells were seeded and treated with DMSO or binimetinib in 10 cm plates, then lifted with 0.05% Trypsin-EDTA and 10<sup>6</sup> cells/mL were spun at 300 g for 3 minutes, washed with ice cold flow buffer [1X PBS supplemented with 3% bovine serum albumin (BSA)] and incubated with fluorophore-conjugated antibody at 0.5  $\mu$ g mL<sup>-1</sup> in flow buffer for 30 minutes on ice. After incubation, cells were washed again, and resuspended in flow buffer plus 5  $\mu$ L of propidium iodide (PI) staining solution (10  $\mu$ g mL<sup>-1</sup>, Invitrogen) per sample. Analyses were performed on an LSRII (BD Biosciences) and all flow cytometry data was analyzed using FlowJo (version 10.7.2). Antibody: Alexa Fluor 488 HLA-A, B, C, clone W6/32 [BioLegend, cat # 311413]. The gating strategy previously described<sup>(1)</sup>.

#### *pMHC-Fab and pMHC-antibody staining*

T2 lymphoblasts: the day prior to Fab staining, T2 lymphoblasts were cultured in RPMI serum-free media containing 50  $\mu$ g/mL peptide of interest at a concentration of 1e<sup>6</sup> cells/mL. Cells were collected by centrifugation and washed 1X in flow buffer. Each sample was resuspended in 10  $\mu$ g/mL Fab for 30 minutes, and then washed 3x in flow buffer. Each sample was then stained with an anti-human Fab goat mAb Alexa Fluor 647 conjugate (Jackson ImmunoResearch) for 30 minutes, and then washed 3x in flow buffer. Samples were resuspended in 200  $\mu$ L sterile PBS pH 7.4 and analyzed on a CytoFLEX (Beckman Coulter). For pMHC-antibody staining (full length IgG), T2 cells were incubated with the peptide of interest

overnight, harvested, and stained with either primary pMHC specific IgG antibodies or a human IgG isotype control (Abcam, ab20619) at 10  $\mu\text{g}/\text{mL}$  for 20 minutes on ice. Cells were then washed with flow buffer 1X and incubated with protein A-488 secondary antibody conjugate (Invitrogen, P11047) for 20 minutes (1:1000 dilution). Cells were washed again with flow buffer and resuspended in PI staining solution prior to analysis on the LSRII. Gating strategy for T2 cells is shown in **Fig. S14A**.

SKMEL5 cells: SKMEL5 cells were pre-treated with DMSO or 1  $\mu\text{M}$  binimetinib for 72 hours in 10 cm plates and were subsequently harvested ( $10^6$  cells/mL), washed, and stained with fluorophore conjugated pMHC-antibodies at 2  $\mu\text{g}/\text{mL}$ , and analyzed using the LSRII. **Fig. S14B** describes the gating strategy for SKMEL5 cells.

#### *Jurkat NFAT-GFP activation*

SKMEL5 cells were treated in 10 cm plates with DMSO or 1  $\mu\text{M}$  binimetinib for 72 hours, after which cells were seeded in a 24 well plate at a ratio of 250,000 SKMEL5 cells to 50,000 Jurkat NFAT-GFP cells (5:1) in Jurkat culture medium with  $n=3$  technical replicates per condition and incubated with a pMHC-specific or anti-GFP (control) BiTE for 24 hours. T2 cells were seeded at 1:1 ratio ( $5 \times 10^4$  cells to  $5 \times 10^4$  cells) in a 96-well round bottom plate. Cells were washed 2x with flow buffer and resuspended in PI staining solution. Cells were gated according to the stagey described in **Fig. S14C**, where the percentage of GFP positive cells were gated so  $\sim 97\%$  of Jurkat cells with no BiTE were classified as GFP negative. SKMEL5 cells were analyzed on the LSRII, T2 on the CytoFLEX.

#### **RNA-sequencing**

RNA was isolated from 10 cm plates of SKMEL5 cells with 3 biological replicates per condition (DMSO, 100 nM binimetinib, 1  $\mu\text{M}$  binimetinib) using Direct-zol RNA miniprep kit (Zymo Research), as previously described (1). RNA were confirmed for quality using the Agilent Fragment Analyzer and 300 ng of material was polyA-selected using NEBNext Poly(A) mRNA Magnetic Isolation Module (E7490) modified to include two rounds of polyA binding and 10 minute incubations. cDNA was generated using the NEB Ultra II directional kit (E7760) following manufacturer instructions using 12 cycles of PCR and a 0.9X SPRI clean. The resulting libraries were quality assessed using the Fragment Analyzer and quantified by qPCR prior to be sequenced on the Illumina HiSeq2000. The 40nt single-end reads with an average depth of 5 million reads per sample were sequenced for all conditions.

RNAseq reads were aligned to the human transcriptome prepared with the hg38 primary assembly and the Ensembl version 95 annotation using STAR version 2.5.3a (5). Gene expression was summarized with RSEM version 1.3.0 and SAMtools version 1.3.(6, 7) Differential expression analysis was performed with DESeq2 version 1.24.0 running under R version 3.6.0 with normal log fold change shrinkage (8). Significance values (adjusted p-value, Wald test) were multiple hypothesis corrected using Benjamini-Hochberg (BH) method. The resulting data were parsed and assembled using Tibco Spotfire Analyst version 7.11.1.

#### **Cloning**

Fabs were subcloned from the Fab-phagemid into an *E. coli* expression vector pBL347. The heavy chain of the IgG was cloned from the Fab plasmid into a pFUSE (InvivoGen) vector with a human IgG1 Fc domain. The light chain of the IgG was cloned from the Fab plasmid into the same vector but lacking the Fc domain. The light chain of the BiTE was cloned from the Fab plasmid into a pFUSE (InvivoGen) vector with an anti-CD3 scFv (OKT3). The heavy chain of the BiTE was cloned into the same vector lacking the OKT3. SCD3-arm of the TriTE was converted into a scFab and cloned into a pFUSE (InvivoGen) vector with the KIH strategy “knob” human Fc domain(9) MLA2-arm of the TriTE was converted into a scFab and cloned into a pFUSE (InvivoGen) vector with the KIH strategy “hole” human Fc domain followed by OKT3. All constructs were sequence verified by Sanger sequencing.

#### **Protein expression and purification**

MHC-peptide complexes were expressed and refolded as previously described.(10) Briefly, MHC-peptide complexes were refolded at 10°C for 3 days and SEC-purified on a HiLoad 16/600 Superdex 75 pg column equilibrated in 10 mM Tris pH 8. After purification, MHC-peptide complexes were biotinylated



using a BirA reaction kit (Avidity) per manufacturer's instructions in the presence of excess peptide and  $\beta_2M$  at 25°C for 4 hours. After biotinylation, MHC-peptide complexes were purified again via SEC to remove excess biotin. Proper folding was assessed by SDS-PAGE. Biotinylation was assessed by pre-incubating MHC-peptide complexes with NeutrAvidin and subsequently assessed by SDS-PAGE.

Fabs were expressed in *E. coli* C43 (DE3) Pro+ as previously described using an optimized autoinduction medium and purified by protein A affinity chromatography (11). IgGs, BiTEs, and TriTEs were expressed in Expi293 BirA cells using transient transfection (Expifectamine, Thermo Fisher Scientific). After transfection for 3–5 d, media was harvested, IgGs and TriTEs purified by Ni-NTA affinity chromatography and BiTEs were purified using protein A affinity chromatography. All proteins were buffer exchanged into PBS pH 7.4 and stored in 10% glycerol at -80°C and assessed by SDS-PAGE.

All proteins were then buffer exchanged into phosphate-buffered saline (PBS) containing 20% glycerol, concentrated, and flash frozen for storage. All other proteins were buffer exchanged into PBS by spin concentration and stored in aliquots at -80°C. The purity and integrity of all proteins were assessed by SDS-PAGE. Fabs were subsequently buffer exchanged into PBS pH 7.4 and stored in 10% glycerol at -80°C and assessed by SDS-PAGE.

### **Fab-phage selection**

Phage selections were run as previously described (Hornsby et al. 2015). Selections were performed on a KingFischer™ System (Thermo Fisher Scientific). Biotinylated antigens were immobilized using streptavidin-coated magnetic beads (Promega). In each round, phage was first cleared by incubation with beads loaded with MHC-peptide complexes loaded with FLU peptide. Unbound phage was next incubated with beads loaded with MHC-peptide complex of interest. Beads were washed and bound phage was eluted with 50  $\mu\text{g}/\text{mL}$  of TEV protease. Four rounds of selection were performed with decreasing amounts of MHC-peptide complex of interest. Selections were performed in PBS+0.02% Tween-20+0.2% bovine serum albumin (PBSTB). Individual phage clones from the fourth round of selections were analyzed by ELISA.

### **Phage ELISA**

For each phage clone, four different conditions were tested – Direct: MHC-peptide complex of interest, Competition: MHC-peptide complex of interest with an equal concentration of MHC-peptide complex in solution, Negative selection: FLU MHC-peptide complex, and Control: PBSTB. 384-well Nunc Maxisorp flat-bottom clear plates (Thermo Fisher Scientific) were coated with 0.5  $\mu\text{g}/\text{mL}$  of NeutrAvidin in PBS overnight at 4°C and subsequently blocked with PBSTB. Plates were washed 3x with PBS containing 0.05% Tween-20 (PBST) and were washed similarly between each of the steps. 20 nM biotinylated MHC-peptide complex was diluted in PBSTB and immobilized on the NeutrAvidin-coated wells for 30 minutes at room temperature, then blocked with PBSTB + 10  $\mu\text{M}$  biotin for 10 minutes. For the competition samples, phage supernatant was diluted 1:5 into PBSTB with 20 nM MHC-peptide complex of interest for 30 minutes prior to addition to the plate. For the direct samples, phage supernatant was diluted 1:5 in PBSTB. Competition and direct samples were added to the plate for 30 minutes at room temperature. Bound phage was detected by incubation with anti-M13-horseradish peroxidase conjugate (Sino Biologicals, 1:5000) for 30 minutes, followed by the addition of TMB substrate (VWR International). The reaction was quenched with the addition of 1 M phosphoric acid and the absorbance at 450 nm was measured using a Tecan M200 Pro spectrophotometer. Clones with high binding to MHC-peptide complex of interest, low binding to PBSTB/FLU MHC-peptide complex, and a competition ratio (Competition AU/Direct AU)  $\geq 0.5$  were carried forward.

### **Bio-layer Interferometry**

BLI measurements were made using an Octet RED384 (ForteBio) instrument. MHC-peptide complex was immobilized on an streptavidin biosensor and loaded for 200 seconds. After blocking with 10  $\mu\text{M}$  biotin, purified binders in solution were used as the analyte. PBSTB was used for all buffers. Data were analyzed using the ForteBio Octet analysis software and kinetic parameters were determined using a 1:1 monovalent binding model.

### **IgG NHS-Fluorophore Conjugation**

Purified IgG's were buffer exchanged into PBS pH 8.3. Concentrated IgG to ~11 mg/mL (with the exception of P2B1 which was only 2 mg/mL), and added 20 mM NHS-AF488 (Fluoroprobes) at either a 10:1 or 5:1 (Dye:IgG) ratio. Conjugation reactions were incubated at room temperature for 1 hour, and then quench by adding equivalent volume of 1 M glycine pH 8.4 as dye. Reactions were further incubated for 1 hour and then buffer exchanged into PBS pH 7.4 until all excess dye was removed. IgG and dye concentration was determined by UV.

### **ADC conjugation**

Purified IgG was buffer exchanged into PBS pH 7.4 and concentrated to 35 $\mu$ M. 20x 100 mM piperidine-derived oxaziridine molecule (12) was added to PBS pH 7.4, and subsequently added to IgG for a final IgG concentration of 35 $\mu$ M. Labeling was conducted at room temperature for 2 hours, and buffer exchanged with PBS pH 7.4 to remove unconjugated oxaziridine. 5% v/v 5 mM DBCO-PEG4-Gluvc-PAB-MMAF (Levena Biopharma) was added to oxaziridine-labeled IgG and incubated overnight at room temperature. IgG was buffer exchanged into PBS pH 7.4 to remove unconjugated MMAF. Conjugation efficiency was assessed by intact protein mass spectrometry using a Xevo G2-XS Mass Spectrometer (Waters).

### **Enrichment analyses**

For pMHC pathway and TAA enrichment analyses, gene names from peptide source proteins were extracted and rank ordered according to the average log<sub>2</sub> fold change over DMSO treated cells. In cases where more than one peptide mapped to the same source protein, the maximum/minimum was chosen, depending on the directionality of enrichment analysis. For RNAseq & protein expression data, data sets were rank ordered according to the mean log<sub>2</sub> fold change value with only protein encoding genes considered.

We utilized gene set enrichment analysis (GSEA) 4.0.3 pre-ranked tool against the Molecular Signatures Database hallmarks gene sets with 1000 permutations, weighted enrichment statistic ( $p=1$ ), and a minimum gene size of 15 (13–15). Results were filtered for FDR q-value  $\leq 0.25$ , and nominal p-value  $\leq 0.05$ . P-values  $> 0.05$  in reported analyses are noted.

### **TCGA/gTEX/Cell line expression analysis**

mRNAseq normalized gene expression data (MD5) from the TCGA skin cutaneous melanoma study (SKCM) for was obtained from Firebrowse (16). Expression for all tumors was z-score normalized, and *BRAF* mutant tumor data was extracted for subsequent analyses. Pairwise gene expression significance comparisons were calculated using an un-paired, two-tailed T test, and significance values for HLA expression between MITF-low and immune subtypes were calculated using Sidak's multiple comparisons test. Tumor versus normal expression profiles for SKCM (Fig. S11) were generated using the Gene Expression Profiling Interactive Analysis 2 (GEPIA2) (17) using data from TCGA and gTEX studies with a jitter size of 0.4 and a p-value cutoff of 0.01 for significance, calculated using a one-way ANOVA statistical test. Expression data for 57 BRAF/NRAS melanoma cell lines was obtained from TRON Cell line Portal (4).

### **Global protein expression profiling sample preparation**

For a quantitative global proteomics analysis, 300  $\mu$ g of supernatant from DMSO and 100 nM MEKi sample for SKMEL5 cells was diluted 8-fold in 8M urea, reduced with 10 mM dithiothreitol in 100 mM ammonium acetate (pH 8.9) at 56°C for 45 minutes, and subsequently alkylated with 50 mM iodoacetamide for 45 minutes rotating at RT in the dark. Lysates were diluted 4-fold with 100 mM ammonium acetate and digested with sequence-grade trypsin (Promega) overnight at RT at an enzyme:substrate ratio of 50:1 (w/w). The reaction was quenched with formic acid (5% total volume) and desalted on C18-based STAGE tips. Solvents: 0.1% formic acid, 90% acetonitrile (MeCN) in 0.1% formic acid, and 60% acetic MeCN in 0.1% formic acid. Volumes were reduced with vacuum centrifugation and lyophilized in 150  $\mu$ g aliquots. Peptide aliquots were labeled with TMT10-plex reagents in 70%

ethanol/150 mM triethylammonium bicarbonate (TEAB) for 1 hour at room temperature, pooled, brought to dryness with vacuum centrifugation, and stored at -80°C.

The labeled mixture was resuspended in 0.1% formic acid, and 25% was loaded onto an Agilent Zorbax 300Extend-C18 5 µm 4.6 × 250 mm column on an Agilent 1200 operating at 1 ml/min for fractionation, as previously described (18). Briefly, peptides were eluted with the following gradient: 1% B to 5% B for 10 mins, 5–35% B for 60 mins, 35-70% B for 15 min, held at 70% B for 5 mins, and was followed by equilibration back to 1% B. Fractions were collected with a Gilson FC203B fraction collector at 1 minute intervals and fractions 10-90 were concatenated to 20 fractions. The fraction volumes were next reduced by vacuum centrifugation, lyophilized, and stored at -80°C prior to analysis.

### **Ubiquitination sample preparation**

SKMEL5 cells were seeded in 10 cm plates and allowed to adhere overnight. Cells were then treated with DMSO or 100 nM binimetinib for 72 hours. Prior to harvest, cells were treated with 100 nM bortezomib (PS-341, SelleckChem) to halt protease activity. Cells were next washed with ice cold 1X PBS and lysed in 8M Urea. Lysates were processed to tryptic peptides as described in the global protein expression methods and desalted using SepPak plus cartridges. Five mg aliquots per sample were lyophilized and stored at 80 °C prior to analysis.

PRMScan ubiquitin remnant motif (anti-K-ε-GG) antibody beads (Cell Signaling Technology, #5562) were crosslinked as previously described.(19) Briefly, beads were washed 3x with 100 mM sodium borate pH 9, incubated in cross linking buffer (20 mM DMP in 100 mM sodium borate pH9) for 30 mins (RT, rotation). Beads were next washed 3x with blocking buffer (200 mM ethanolamine, pH 8) and incubated for 2 hours at 4°C rotating. Crosslinked beads were washed 3x with immunoprecipitation buffer (100 mmol/l Tris-HCl, 1% Nonidet P-40 at pH 7.4) and stored in 1X PBS with 0.02% sodium azide at 4°C prior to use.

Each sample was resuspended in 1 mL IP buffer and added to 40 uL bead slurry of conjugated anti-K-ε-GG beads and incubated for 2 hours rotating at 4°C.(20) Peptides were washed 2x with IP buffer and 3x with 1X PBS, and diGly peptides were eluted 2x with 0.2% TFA for 5 minutes. To improve specificity, each lysate was IP'd twice, following the same IP protocol with the first elution. Finally, peptides were dried with vacuum centrifugation and lyophilized.

Lyophilized samples were next labeled with 100 µg of TMT-6plex, as described in the MHC labeling methods section. A high pH reverse-phase peptide fraction kit was used to separate labeled peptides into six fractions, according to manufacturer's instructions (17.5%, 20%, 22.5%, 25%, 30%, and 70% MeCN, Thermo Scientific). Peptide fraction volume was reduced with vacuum centrifugation, lyophilized, and stored at -80°C prior to analysis.

### **HF-X LC-MS/MS data acquisition**

#### *Chromatography:*

Peptides were resuspended in 0.1% acetic acid and loaded on a precolumn packed in-house (100 µm ID × 10 cm packed with 10 µm C18 beads (YMC gel, ODS-A, 12 nm, S-10 µm, AA12S11)). The precolumn was then washed with 0.1% acetic acid and connected in series to an analytical capillary column with an integrated electrospray tip (~1 µm orifice) with 5µM C18 beads, prepared in house ((50 µm ID × 12 cm with 5 µm C18 beads (YMC gel, ODS-AQ, 12 nm, S-5 µm, AQ12S05)).

#### *Labeled pMHC analyses:*

Peptides were eluted using a 130-minute gradient with 10-45% buffer B (70% Acetonitrile, 0.2M acetic acid) from 5-100 minutes and 45-55% buffer B from 100-120 minutes at a flow rate of 0.2 mL/min for a flow split of approximately 10,000:1. Peptides were analyzed using a Thermo Q Exactive HF-X Hybrid Quadrupole-Orbitrap mass spectrometer, and data was acquired using Thermo Fisher Scientific Xcalibur version 2.9.0.2923. Standard mass spectrometry parameters were as follows: spray voltage, 2.5 kV; no sheath or auxiliary gas flow; heated capillary temperature, 250 °C.

The HF-X was operated in data-dependent acquisition (DDA) mode for LF and TMT analyses. LF: Full-scan mass spectrometry spectra (mass/charge ratio ( $m/z$ ), 350 to 2,000; resolution, 60,000) were detected in the Orbitrap analyzer after accumulation of ions at  $3e^6$  target value with a maximum IT of 50

ms. For every full scan, the top 20 most intense ions were isolated (isolation width of 0.4  $m/z$ ) and fragmented (collision energy (CE): 28%) by higher energy collisional dissociation (HCD) with a maximum injection time of 350 ms, AGC target  $1e^5$ , and 30,000 resolution. Charge states  $< 2$  and  $> 4$  were excluded, and dynamic exclusion was set to 45 seconds. TMT: Full-scan mass spectrometry spectra (mass/charge ratio ( $m/z$ ), 400 to 2,000; resolution, 60,000) were detected in the Orbitrap analyzer after accumulation of ions at  $3e^6$  target value with a maximum IT of 50 ms. For every full scan, the 20 most intense ions were isolated (isolation width of 0.4  $m/z$ ) and fragmented (collision energy (CE): 31%) by higher energy collisional dissociation (HCD) with a maximum injection time of 350 ms, AGC target  $1e^5$ , and 30,000 resolution. Charge states  $< 2$  and  $> 4$  were excluded, and dynamic exclusion was set to 60 seconds.

#### *Global protein expression profiling:*

Peptides were analyzed using a Thermo Q Exactive HF-X Hybrid Quadrupole-Orbitrap mass spectrometer. Standard mass spectrometry parameters were as follows: spray voltage, 2.5 kV; no sheath or auxiliary gas flow; heated capillary temperature, 250°C. Peptides were eluted with 80% acetonitrile in 0.1% formic acid (buffer B) in following gradient: 0–10% buffer B for 5 min, 10–30% for 100 min, 30–40% for 14 min, 40–60% for 5 min, 60–100% for 2 min, held at 100% of 10 mins, and equilibrated back to 0.1% formic acid. All twenty fractions were analyzed back-to-back.

The HF-X was operated in data-dependent acquisition (DDA) mode. Full-scan mass spectrometry spectra (mass/charge ratio ( $m/z$ ), 300 to 2,000; resolution, 60,000) were detected in the Orbitrap analyzer after accumulation of ions at  $3e^6$  target value with a maximum IT of 50 ms. For every full scan, the 15 most intense ions were isolated (isolation width of 0.4  $m/z$ ) and fragmented (collision energy (CE): 31%) by HCD with a maximum injection time of 350 ms, AGC target  $1e^5$ , and 30,000 resolution. Charge states of 1 and  $>7$  were excluded, and dynamic exclusion was set to 20 seconds.

#### *Ubiquitination analyses:*

The same gradient and standard instrument parameters from global protein expression profiling were used for ubiquitination analyses. The HF-X was operated in data-dependent acquisition (DDA) mode. Full-scan mass spectrometry spectra (mass/charge ratio ( $m/z$ ), 400 to 1,250; resolution, 60,000) were detected in the Orbitrap analyzer after accumulation of ions at  $5e^5$  target value with a maximum IT of 100 ms. For every full scan, the 20 most intense ions were isolated (isolation width of 0.4  $m/z$ ) and fragmented (collision energy (CE): 33%) by HCD with a maximum injection time of 300 ms, AGC target  $1e^5$ , and 60,000 resolution. Charge states of  $<3$  and  $>7$  were excluded, and dynamic exclusion was set to 30 seconds. The six fractions were analyzed back-to-back to minimize effects from instrument performance variation.

#### **Exploris 480 LC-MS/MS data acquisition**

pMHC samples were analyzed using an Orbitrap Exploris 480 mass spectrometer (Thermo Scientific) coupled with an UltiMate 3000 RSLC Nano LC system (Dionex), Nanospray Flex ion source (Thermo Scientific), and column oven heater (Sonation). Samples were resuspended in 0.1% formic acid and directly loaded onto a 10-15 cm analytical capillary chromatography column with an integrated electrospray tip ( $\sim 1 \mu\text{m}$  orifice), prepared and packed in house ( $50 \mu\text{m}$  ID  $1.9 \mu\text{m}$  C18 beads, ReproSil-Pur). Unless otherwise defined, Standard mass spectrometry parameters were as follows: spray voltage, 2.0 kV; no sheath or auxiliary gas flow; heated capillary temperature, 275 °C.

Labeled DDA pMHC analyses: pMHC elutions were injected in 15-25% fractions for improved coverage of the immunopeptidome. TMT-6/10 chromatography: Peptides were eluted using a gradient with 8-25% buffer B for 50 minutes, 25-35% for 25 minutes, 35-55% for 5 minutes, 55-100% for 2 minutes, hold for 1 minutes, and 100% to 3% for 2 minutes. TMT-Pro chromatography: Peptides were eluted using a gradient with 8-25% buffer B for 50 minutes, 25-45% for 30 minutes, 45-100% for 2 minutes, hold for 1 minutes, and 100% to 3% for 2 minutes.

The Exploris was operated in data dependent acquisition (DDA) mode. Full scan mass spectra (350-1200  $m/z$ , 60,000 resolution) were detected in the orbitrap analyzer after accumulation of  $3e^6$  ions

(normalized AGC target of 300%) or 25 ms. For every full scan, MS<sup>2</sup> were collected during a 3 second cycle time. Ions were isolated (0.4 m/z isolation width) for a maximum of 150 ms or 75% AGC target and fragmented by HCD with 32% CE (TMT-6/10) or 30% (TMT-pro) at a resolution of 45,000. Charge states < 2 and > 4 were excluded, and precursors were excluded from selection for 30 seconds if fragmented n=2 times within 20 second window.

*Isotopologue absolute quantification analyses:*

*Survey analyses of 4H peptides:* Peptides were eluted with 6-25% buffer B for 53 minutes, 25-45% for 12 minutes, 45-97% for 3 minutes, and 97% to 3% for 1 minute. The Exploris was operated in data dependent acquisition (DDA) mode with an inclusion list(2). Full scan mass spectra (300-1500 m/z, 120,000 resolution) were detected in the orbitrap analyzer after accumulation of 3e<sup>6</sup> ions or 50 ms. For each full scan, up to 20 ions were subsequently isolated for targets on the inclusion with (+/- 5 ppm of targets m/z) with a minimum intensity threshold of 1e<sup>6</sup>. Ions were collected with a 10s maximum injection time, AGC target: 1000%, and fragmented by HCD with 30% nCE.

*SureQuant-IsoMHC targeted analyses:* Standard mass spectrometry parameters for SureQuant acquisition are as follows: spray voltage: 1.6kV, heated capillary temperature: 280°C. A custom SureQuant acquisition method was built using the Thermo Orbitrap Exploris Series 2.0 software. Full-scan mass spectra were collected with scan range: 350-1200 m/z, AGC target value: 3e<sup>6</sup>, maximum IT: 50 ms, resolution: 120,000. 4H peptides matching the m/z (+/- 3 ppm) and exceeding the defined intensity threshold (1% apex intensity from the survey analysis) were isolated (isolation width 1 m/z) and fragmented by HCD (nCE: 27%) with a scan range: 150-1700 m/z, maximum IT: 10 ms, AGC target: 1000%, resolution: 7,500.

A product ion trigger filter next performs pseudo-spectral matching, where an MS<sup>2</sup> scan of the 1H, 2H, 3H, and endogenous peptides are triggered at the defined mass offsets if the 4H trigger peptide contains n ≥ 5 product ions from the defined list. Scan parameters are the same as the first MS<sup>2</sup> scan but with 250 ms max IT, resolution 120,000. The inclusion list, ions for pseudo-spectral matching, and additional method parameters and details have been previously reported.(2)

**LC-MS/MS data analysis:**

All mass spectra were analyzed with Proteome Discoverer (PD, version 2.5) and searched using Mascot (version 2.4) against the human SwissProt database. MS/MS spectra were matched with an initial mass tolerance of 10 ppm on precursor masses and 20 mmu for fragment ions. Data analyses were performed using Matlab version R2019b, and Microsoft Excel version 16.34

*pMHC analyses:* No enzyme was used, static modifications included N-terminal and lysine TMT, and variable modifications included oxidized methionine for all analyses and phosphorylated serine, threonine, and tyrosine for cell treatment analyses. Treatment analyses were also searched against a previously published catalog of over 40,000 predicted antigenic mutations in cancer cell lines.(21) Heavy leucine-containing peptides were searched for separately with heavy leucine (+7), c-terminal amidation, and methionine oxidation as dynamic modifications against a custom database of the synthetic peptide standards. All analyses were filtered with the following criteria: search engine rank =1, isolation interference ≤ 30%, and length between 8 and 15 amino acids. Label-free analyses were filtered with ion score ≥ 20, and labeled samples were filtered with ion score ≥ 15 and percolator q-value ≤ 0.05. Area under the curve (AUC) quantitation was performed using the minora feature detector in PD with match between runs enabled and filtered for ion score ≥ 20.

For TMT-labeled *in vitro* samples, ratios against a reference channel (usually TMT126) were calculated and the median of all ratios for correction hipMHCs was used to determine the final correction parameters. Only PSMs of heavy leucine-coded peptides with an average reporter ion intensity within 10-fold of the interquartile range of endogenous PSM reporter ion intensities were used for correction. To evaluate differences between conditions, the log<sub>2</sub> transformed ratio of arithmetic mean intensity for drug- and DMSO-treated samples (n=3) was calculated. To determine if peptides were significantly increasing, an unpaired, 2-sided t-test was performed, and peptides with p ≤ 0.05 were considered significantly increasing/decreasing. To evaluate which peptides were significantly enriched above the mean, treated

samples were mean centered by dividing the ion intensity of each peptide by the mean fold-change across all peptides, after which a student's 2-tailed t-test was performed on adjusted values. Peptides with a mean-adjusted p-value  $\leq 0.05$  were considered significantly enriched. Mean centering was not performed on samples where the mean  $\log_2$  fold change was between -0.07 and 0.07.

*Global protein expression profiling:* Enzyme: trypsin, allowing for up to 2 missed cleavages. Cysteine carbamidomethylation, TMT-labeled lysine, and peptide N-termini were searched as fixed modifications, and oxidated methionine was set as a variable modification. PSMs from all fractions were filtered according to search engine rank = 1, ion score  $\geq 20$ , precursor isolation interference  $\leq 30\%$ . Reporter ion abundances for peptides mapping to the same protein were summed, and quantification was corrected by normalizing with the median fold change in TMT abundances over TMT-126 to account for variations in sample input. To determine differences in protein expression, an unpaired, 2-sided t-test was performed, and peptides with  $p \leq 0.05$  were considered significantly changing.

*Ubiquitination analysis:* Enzyme: trypsin, allowing for up to 2 missed cleavages. Cysteine carbamidomethylation was set as a static modification, and dynamic modifications were set as diGly-TMT on lysine residues (monoisotopic: 343.20), and N-terminal TMT. PSMs from 6 fractions were filtered to the following criteria: di-Gly modification, search engine rank = 1, ion score  $\geq 15$ , precursor isolation interference  $\leq 30\%$ . Reporter ion intensities were summed for PSMs mapping to the same peptide, and the fold change in abundance was calculated by taking the average reporter ion abundance for  $n=3$  replicates per condition. Variation in sample input was account for by normalizing each reporter channel to the median fold change over TMT-126 across all peptides. When multiple peptides mapped to a source protein, the maximal fold change value was used for pMHC comparisons. Significance values were calculated using an unpaired, 2-sided t-test was performed, and peptides with  $p \leq 0.05$  were considered significantly changing.

*Isotopologue absolute quantification analyses:*

Peak areas of 6 preselected product ions for each peptide (endogenous and 1-3H isotopologues) were exported from Skyline ((version 20.2.1.28)(22) and summed for all ions quantifiable across the endogenous and isotopologues as previously described.(2) 1-3H peptides were used to generate a calibration curve, from which endogenous pMHC concentrations were determined. Concentrations outside of the standard curve were extrapolated.

## SUPPLEMENTARY REFERENCES

1. L. E. Stopfer, J. M. Mesfin, B. A. Joughin, D. A. Lauffenburger, F. M. White, Multiplexed relative and absolute quantitative immunopeptidomics reveals MHC I repertoire alterations induced by CDK4/6 inhibition. *Nat. Commun.* **11**, 1–14 (2020).
2. L. E. Stopfer, *et al.*, Absolute quantification of tumor antigens using embedded mhc-i isotopologue calibrants. *Proc. Natl. Acad. Sci. U. S. A.* **118**, e2111173118 (2021).
3. V. Jurtz, *et al.*, NetMHCpan-4.0: Improved Peptide–MHC Class I Interaction Predictions Integrating Eluted Ligand and Peptide Binding Affinity Data. *J. Immunol.* **199**, 3360–3368 (2017).
4. J. Scholtalbers, *et al.*, TCLP: an online cancer cell line catalogue integrating HLA type, predicted neo-epitopes, virus and gene expression. *Genome Med.* **7**, 118 (2015).
5. A. Dobin, *et al.*, STAR: Ultrafast universal RNA-seq aligner. *Bioinformatics* **29**, 15–21 (2013).
6. H. Li, *et al.*, The Sequence Alignment/Map format and SAMtools. *Bioinformatics* **25**, 2078–2079 (2009).
7. B. Li, C. N. Dewey, RSEM: accurate transcript quantification from RNA-Seq data with or without a reference genome. *BMC Bioinformatics* **12**, 323 (2011).
8. S. Anders, W. Huber, Differential expression analysis for sequence count data. *Genome Biol.* **11**, R106 (2010).
9. R. JB, P. LG, C. P, “Knobs-into-holes” engineering of antibody CH3 domains for heavy chain heterodimerization. *Protein Eng.* **9**, 617–621 (1996).
10. B. Rodenko, *et al.*, Generation of peptide-MHC class I complexes through UV-mediated ligand exchange. *Nat. Protoc.* **1**, 1120–1132 (2006).
11. M. Hornsby, *et al.*, A High Through-put Platform for Recombinant Antibodies to Folded Proteins. *Mol. Cell. Proteomics* **14**, 2833 (2015).
12. S. K. Elledge, *et al.*, Systematic identification of engineered methionines and oxaziridines for efficient, stable, and site-specific antibody bioconjugation. *Proc. Natl. Acad. Sci. U. S. A.* **117**, 5733–5740 (2020).
13. V. K. Mootha, *et al.*, PGC-1 $\alpha$ -responsive genes involved in oxidative phosphorylation are coordinately downregulated in human diabetes. *Nat. Genet.* **34**, 267–273 (2003).
14. A. Subramanian, *et al.*, Gene set enrichment analysis: A knowledge-based approach for interpreting genome-wide expression profiles. *Proc. Natl. Acad. Sci. U. S. A.* **102**, 15545–15550 (2005).
15. A. Liberzon, *et al.*, The Molecular Signatures Database Hallmark Gene Set Collection. *Cell Syst.* **1**, 417–425 (2015).
16. R. Akbani, *et al.*, Genomic Classification of Cutaneous Melanoma. *Cell* **161**, 1681–1696 (2015).
17. Z. Tang, B. Kang, C. Li, T. Chen, Z. Zhang, GEPIA2: an enhanced web server for large-scale expression profiling and interactive analysis. *Nucleic Acids Res.* **47**, W556–W560 (2019).
18. A. Dittmann, *et al.*, High-fat diet in a mouse insulin-resistant model induces widespread rewiring of the phosphotyrosine signaling network. *Mol. Syst. Biol.* **15** (2019).
19. N. D. Udeshi, P. Mertins, T. Svinkina, S. A. Carr, Large-scale identification of ubiquitination sites by mass spectrometry. *Nat. Protoc.* **8**, 1950–1960 (2013).
20. C. M. Rose, *et al.*, Highly Multiplexed Quantitative Mass Spectrometry Analysis of Ubiquitylomes. *Cell Syst.* **3**, 395–403.e4 (2016).
21. S. Boegel, M. Löwer, T. Bukur, U. Sahin, J. C. Castle, A catalog of HLA type, HLA expression, and neoepitope candidates in human cancer cell lines. *Oncoimmunology* **3** (2014).
22. B. MacLean, *et al.*, Skyline: An open source document editor for creating and analyzing targeted proteomics experiments. *Bioinformatics* **26**, 966–968 (2010).

## **SUPPLEMENTARY DATA**

**Data S1.** In vitro quantitative immunopeptidomics datasets for all cell lines and treatment conditions.

**Data S2.** In vivo Quantitative immunopeptidomics for all cell line xenografts and treatment conditions.

**Data S3.** Transcript expression of SKMEL5 cells +/- 100 nM and 1 uM binimetinib treatment for 72 hours.

**Data S4.** Protein expression of SKMEL5 cells +/- 100 nM binimetinib treatment for 72 hours.

**Data S5.** Peptide ubiquitination levels of SKMEL5 cells +/- 100 nM binimetinib treatment for 72 hours.

**Data S6.** Absolute quantification of 18 tumor associated antigens



## SUPPLEMENTARY TABLES

**Table S1.** Allelic profile of melanoma cell lines.

| <b>Cell line</b> | <b>HLA-A</b> | <b>HLA-B</b> | <b>HLA-C</b> |
|------------------|--------------|--------------|--------------|
| SKMEL5           | 02:01, 11:01 | 40:01, 07:02 | 03:04, 07:02 |
| SKMEL28          | 11:01        | 40:01        | 03:04        |
| IPC298           | 24:02, 03:01 | 07:02, 35:02 | 04:01, 07:02 |
| SKMEL2           | 26:01, 03:01 | 38:01, 35:08 | 04:01, 12:03 |
| A375             | 01:01, 02:01 | 44:03, 57:01 | 06:02, 16:01 |
| RPMI-7951        | 01:01, 02:01 | 08:01, 13:02 | 07:01, 06:02 |

**Table S2.** Tumor associated antigen peptide library for enrichment analyses.

|              |              |              |              |             |              |
|--------------|--------------|--------------|--------------|-------------|--------------|
| AAAAAIFVI    | ALIHNNHNL    | AMLDLLKSV    | AVFDGAQVTSK  | DLTSFLLSL   | ESDPIVAQY    |
| AAANIIRTL    | ALISKNPV     | AMLERQFTV    | AVLTKQLLH    | DLWKETVFT   | ESFSGSLGLH   |
| AAFDGRHSQTL  | ALKDSVQRA    | AMLGTHTEV    | AVMALENNYEV  | DNGAKSVVL   | ESLFRAVITK   |
| AAGIGILTV    | ALKDVEERV    | AMLGTHTEVTV  | AVQEFGLARFK  | DPARYEFLW   | ESVMINGKY    |
| AARAVFLAL    | ALLALTSAV    | AMTKDNLL     | AVTNVRTSI    | DPKDAEKAI   | ETAGPQGGPPHY |
| AAVEEGIVLGGG | ALLAVGATK    | AMVGAVLTA    | AVVDLQGGGHSY | DPSTDYYQEL  | ETFTEGQKL    |
| ACDGERPTL    | ALLEIASCL    | AMYDKGPFRSK  | AVVGILLVV    | DPYKATSAV   | ETHLSSKRY    |
| ACDPHSGHFV   | ALLESSLRQA   | ANADLEVKI    | AVYQKEIHRK   | DQYPYLKSV   | ETILTFHAF    |
| AEEAAGIGIL   | ALLKDTVYT    | ANDPIFVVL    | AWISKPPGV    | DRASFIKNL   | ETLGLFNHY    |
| AEEAAGIGILT  | ALLMPAGVPL   | APAGRPSAS    | AWLVAAAEI    | DSDPDSFQDY  | ETVELQISL    |
| AEEHSIATL    | ALLNIKVKL    | APAGRPSASR   | AYACNTSTL    | DSFPMEIRQY  | ETVSEQSNV    |
| AEHIESRTL    | ALLPSLSHC    | APAGVREVM    | AYDFLYNYL    | DSFPMEIRQYL | EVAPDAKSF    |
| AEINNIKI     | ALLPTALDAL   | APDGAKVASL   | AYGLDFYIL    | DTEFPNFKY   | EVAPPASGTR   |
| AELSKTNTL    | ALMDKSLHV    | APLLRWVL     | AYIDFEMKI    | DVNGLRRLV   | EVDPASNTY    |
| AELLNIPFLY   | ALMEQQHYV    | APLQRSQSL    | AYTKKAPQL    | DVTSAPDNK   | EVDPIGHLY    |
| AELVHFLLL    | ALMVRQARGL   | APNTGRANQQM  | AYVPQQAWI    | DVWSFGILL   | EVDPIGHLYIF  |
| AEPINIQTW    | ALNFPQSQK    | APRGVMAV     | CHILLGNYC    | DYIGPCKYI   | EVDPIGHVY    |
| AFLPWHRFL    | ALPPPMLL     | APVIKARMM    | CIAEQYHTV    | DYKSAHKGF   | EVFEGREDSVF  |
| AFLRHAAL     | ALPSFQIPV    | AQAEHSITRV   | CILGKLFTK    | DYLQCVLQI   | EVFPLAMNY    |
| AGDGTTTATVLA | ALQDIGKNIYTI | AQCQETIRV    | CITFQVWDV    | DYLQYVLQI   | EVFPLAMNYL   |
| AGFKGEQKGEPE | ALQKAKQDL    | AQDPHSLWV    | CLAFPAPAKA   | DYLRSVLEDF  | EVFNANFRSF   |
| AGYLMELCC    | ALRCASPWL    | AQPDTAPLPV   | CLGHNHKEV    | DYPSLSATDI  | EVHNLNQLLY   |
| AHVDKCLEL    | ALREEEEGV    | AQYEHDLVA    | CLLSGYIFA    | DYSARWNEI   | EVIGRGHFGCVY |
| AIDELKECF    | ALSDHHIYL    | ARGPESRLL    | CLLWSFQ TSA  | EAAGIGILTV  | EVIPTYTAM    |
| AIIDPLIYA    | ALSEDLLSI    | ARGQPQVMG    | CLVFLAPAKA   | EADPTGHSY   | EVIPTYTAMQR  |
| AISGDSVPV    | ALSVMGVYV    | ARHRRSLRL    | CLVFPAPAKA   | EAFIQPITR   | EVIPTYTAMQRY |
| AISANIADI    | ALTAVAEV     | ARSVRTRRL    | CLVFPAPAKAV  | EEFGRAFSF   | EVIQWLAKL    |
| AIYDHINEGV   | ALTDIDLQL    | ARTDLEMQI    | CMHLLLEAV    | EEKLIVLFL   | EVISCKLIKR   |
| AIYDHNVEGV   | ALTEHSLMGM   | ASERGRLLY    | CMLGDPVPT    | EEYLQAFY    | EVISSRGTSM   |
| AIYKQSQHM    | ALTERSLMGM   | ASFDKAKLK    | CMTWNQMNL    | EEYNHQSL    | EVITSSRTTI   |
| AKYLMELTM    | ALTPVVVTL    | ASGPGGAPR    | CQWGRWLQL    | EFKRIVQRI   | EVKLSDYKGYV  |
| ALAGLSPV     | ALVDAGVPM    | ASLSDPWV     | CTACRWWKACQ  | EFQKMRRDL   | EVLDSLVLQY   |
| ALAPAPAEV    | ALVSIKV      | ASLIYRRRLMK  | CTACRWWKACQR | EGDCAPEEK   | EVLRLPGLHFR  |
| ALARGAGTVPL  | ALWGPDPAAA   | ASSTLYLVF    | CYMEAVL      | EILGALLSI   | EVMSNMETF    |
| ALASHLIEA    | ALWGPDPAAAF  | ASYLDK VRA   | CYTWNQMNL    | ELAEYLYNI   | EVRGDVFP SY  |
| ALAVLSVTL    | ALWKEPGSNV   | ATAGDGLIELRK | DAKNKLEGL    | ELAGIGILTV  | EVTTFVPLY    |
| ALCQNGYHGT   | ALWMRLLPL    | ATAGIIGVNR   | DALVLKTV     | ELAPIGHNRMY | EVTSSGR TSI  |
| ALCQNGYHGTI  | ALWMRLLPLL   | ATAQFKINK    | DCLVFLAPA    | ELFQDLSQL   | EVVEKEYEYI   |
| ALCRWGLLL    | ALWPWLLMA    | ATATPCWTWLL  | DEKQQHIVY    | ELHLLQDEEV  | EVVHKIIE     |
| ALDEKLLNI    | ALWPWLLMA(T) | ATFSSSHRYHK  | DELEIKAY     | ELHLLQDKEV  | EVVRIGHLY    |
| ALDGGNKHFL   | ALWPWLLMAT   | ATGFKQSSK    | DEVYQVTYV    | ELSDSLGPV   | EVYDGREHSA   |
| ALDVYNGLL    | ALYGDIDAV    | ATIIDILTK    | DFMIQGGDF    | ELTLGEFLK   | EYILSLEEL    |
| ALEEANADL    | ALYLVCGER    | ATLPLLCAR    | DIKAKMQAS    | ELTLGEFLKL  | EYLQLVFGI    |
| ALENNYEV     | ALYSGVHKK    | ATQIPSYKK    | DLVKKMPL     | ELVRRILSR   | EYLSLSDKI    |
| ALFDIESKV    | ALYVDSLFFL   | ATSPPASVR    | DLILELLDL    | ELWKNPTAF   | EYRGFTQDF    |
| ALGDLFQSI    | AMAPIKVRL    | ATTNILEHY    | DLKGFLSYL    | EPLARLEL    | EYSKECTKEF   |
| ALGGHPLLGV   | AMAQDPHSL    | ATVIGIMGV    | DLLSHAFFA    | EQYEQILAF   | EYSRRHPQL    |
| ALIDCNPCTL   | AMAQDPHSLWV  | AVAANIVLTV   | DLPAYVRNL    | ERGFYTPK    | EYTAKIALL    |
| ALIEVGDHFC   | AMARDPHSL    | AVASLLKGR    | DLPPPPPLL    | ERLERQERL   | EYYLQNAFL    |
| ALIGGPPV     | AMARDPHSLWV  | AVCPWTWLR    | DLSPGLPAA    | ERSPVIQTL   | FALQLHDPSGY  |

Table S2 continued

|             |             |             |             |              |              |
|-------------|-------------|-------------|-------------|--------------|--------------|
| FATPMEAEL   | FLPETEPEM   | FVGEFFTDV   | GLWRHSPCA   | HTMEVTYHR    | IMIHDLCCLA   |
| FATPMEAELAR | FLPETEPEML  | FVSGSGIAIA  | GLYDGM EHL  | HTRTPPIHR    | IMIHDLCCLV   |
| FAWERVRGL   | FLPHFQALHV  | FVSGSGIATA  | GMVTTSTTL   | HTYLEPGPVTAQ | IMIHDLCCLVFL |
| FEITPPVVL   | FLPRNIGNA   | FVWLHYYSV   | GMWESNANV   | HVDSTLLQ     | IMLCLIAAV    |
| FGLATEKSR   | FLQDVMNIL   | FYTPKTRRE   | GPFGAVNNV   | HVDSTLLQV    | IMNDMPIYM    |
| FGLFPRPCPV  | FLRAENETGNM | GADGVGKSA   | GPFGPPMPLHV | HVYDGKFLAR   | IMPGQEAGL    |
| FIASNGVKLV  | FLRNFSML    | GADGVGKSAL  | GPRESRPPA   | HYTNASDGL    | IMPKAGLLI    |
| FIDKFTPPV   | FLRNFSLMV   | GAFEHLPSL   | GQHLHLET    | IALNFPGSQK   | IPSDLERRIL   |
| FIDNTDSVV   | FLRNLPVRT   | GAIAAIMQK   | GRAPQVLVL   | IARNLTQQL    | IPSNPRYGM    |
| FIDSYICQV   | FLSSANEHL   | GASGVGSGL   | GSHLVEALY   | ICLHHLPFWI   | IQATVMIIV    |
| FIFPASKVYL  | FLSTLTIDGV  | GCELKADKDY  | GSPATWTRR   | IESRTLAI     | IRRGVMLAV    |
| FIFSILVLA   | FLTGNQLAV   | GDFGLATEK   | GSSDVIIHR   | IEVDGKQVEL   | ISGGPRISY    |
| FIENLCAA    | FLTKRGGQV   | GEISEKAKL   | GTAAIQAHY   | IIGGGMAFT    | ISKPPGVAL    |
| FILPVLGAV   | FLTKRGRQV   | GERGFFYT    | GTADVHFER   | IIMFDVTSR    | ISSVLAGASCPA |
| FINDEIFVEL  | FLTKRSGQV   | GEVDVEQHTL  | GTATLRLVK   | IISAVVGIL    | ISTQQQATFLL  |
| FIQVYEVEA   | FLTKRSGQVCA | GFKQSSKAL   | GTMDCTHPL   | IITEVITRL    | ITARPVLW     |
| FKNIVTPRT   | FLTKRSRQV   | GIMAIELAE   | GTMDCTHSL   | ILAKFLHWL    | ITDFGLAKL    |
| FLAELAYDL   | FLTPKKLQCV  | GIPPAPHGV   | GTSSVIVSR   | ILAKFLHWLe   | ITDFGLARL    |
| FLAKLNNTV   | FLTPLRNFL   | GIPPAPRGV   | GTWESNANV   | ILAVDGVLSV   | ITDQVPFSV    |
| FLALIICNA   | FLTSGTQFSDA | GIVEQCCTSI  | GTYEGLLRR   | ILDEKPVII    | ITKKVADLVGF  |
| FLAPAKAVV   | FLWGPRALA   | GLAPPQHLIRV | GVALQTMKQ   | ILDGFLAKL    | ITQPGPLAPL   |
| FLAPAKAVVYV | FLWGPRALV   | GLASFKSFLK  | GVFIQVYEV   | ILDKKVEKV    | ITQPGPLVPL   |
| FLASESLIKQI | FLWGPRAYA   | GLCEREDLL   | GVLVGVALI   | ILDKVLVHL    | IVDCLTEMY    |
| FLDEFMEGV   | FLWSVFMLI   | GLEALVPLAV  | GVNPVVSYAV  | ILDSSEEDK    | IVDSLTEMY    |
| FLDRFLSCM   | FLWSVFWLI   | GLEKIEKQL   | GVRGRVEEI   | ILDTAGREEY   | IYMDGTADFSF  |
| FLEGNEVGKTY | FLYDDNQRV   | GLFDEYLEMV  | GVYDGREHTV  | ILFGISLREV   | KAFLTQLDEL   |
| FLFAVGFYL   | FLYGALLLA   | GLFGDIYLA   | GYCASLFAIL  | ILGALLSIL    | KAFQDVLVY    |
| FLFDGSPTY   | FLYTLLREV   | GLGLPKLYL   | GYDQIMPKI   | ILHNGAYSL    | KAKQDLARL    |
| FLFLLFFWL   | FMHNRLQYSL  | GLGNRWTSRT  | GYDQIMPCK   | ILIDWLQVQ    | KALRLSASALF  |
| FLGMESCGI   | FMNKFIYEI   | GLGPVAAV    | HAIPHYVTM   | ILKDFSILL    | KASEKIFYV    |
| FLGYLILGV   | FMTRKLWDL   | GLIEKNIEL   | HIAGSLAVV   | ILLEAPTGLA   | KAYGASKTFGK  |
| FLHHLIAEIH  | FMTSSWWGA   | GLKAGVIAV   | HLCGSHLVEA  | ILLEAPTGLV   | KCDICTDEY    |
| FLIHWQNTM   | FMTSSWWRA   | GLLDKAVSNV  | HLFGYSWYK   | ILLRDAGLV    | KCQEVLAWL    |
| FLIVLSVAL   | FMTSSWWRAPL | GLLDQVAAL   | HLLTSPKPSL  | ILLWAARYD    | KEADPTGHSY   |
| FLLDILGAT   | FMVEDETVL   | GLLETTVQKV  | HLSTAFARV   | ILMEHIHKL    | KEAGNINTSL   |
| FLLENAAYL   | FMVELVEGA   | GLLGQEGLVEI | HLSYHRLLPL  | ILMEHIHKLK   | KECVLHDDL    |
| FLLENAAYLD  | FPALRFVEV   | GLLQVHHSCPL | HLSYHWLLPL  | ILMEHIHKLKA  | KECVLRDDL    |
| FLLFIFKVA   | FPSDSWCYF   | GLMDVQIPT   | HLVEALYLV   | ILMHCQTTL    | KEFEDDIINW   |
| FLLGLIFLL   | FPYGTTVTY   | GLPAGAAAQA  | HLWVKNMFL   | ILNAMI       | KEFEDGIINW   |
| FLLKAEVQKL  | FQRQGQTAL   | GLPGQEGLVEI | HLWVKNVFL   | ILPLHGPEA    | KEFKRIVQR    |
| FLLKLTPLL   | FRSGLDSYV   | GLPPDVQRV   | HLYQGCQVV   | ILSAHVATA    | KEFTVSGNILT  |
| FLLQMMQICL  | FSIDSPDSL   | GLPPDVQRVh  | HMYHSLYLK   | ILSLELMKL    | KELEGILL     |
| FLLQMMQVCL  | FSYMGPSQRPL | GLPPPPPLL   | HPLVFHTNR   | ILTVILGVL    | KELPSLHVL    |
| FLLSLFSLWL  | FTHNEYKFYV  | GLQHWVPEL   | HPRQEIAL    | ILVLASTITI   | KEPSEIVEL    |
| FLMLVGGSTL  | FTWAGKAVL   | GLQLGVQAV   | HPRYFNQLST  | ILYENNVITV   | KEWMPVTKL    |
| FLMSSWWPNL  | FTWAGQAVL   | GLREDLLSL   | HQILKGGSGTY | ILYENNVIV    | KFHRVIKDF    |
| FLNQDDEL    | FTWEGLYNV   | GLREREDLL   | HRWCIPWQRL  | IMAIELAE     | KFLDALISL    |
| FLPATLTMV   | FVEHDDSPGL  | GLRRVDEL    | HSATGFKQSSK | IMDQVPFSV    | KGSGKMKTE    |
| FLPEFGISSA  | FVEHDLYCTL  | GLSPNLNRFL  | HSSHWLRLP   | IMFDVTSRV    | KIADPICTFI   |
| FLPETEPEI   | FVFLRNFSL   | GLSTILLYH   | HSWITRSEA   | IMIGVLVGV    | KIDEKTAELK   |

Table S2 continued

|              |             |             |             |             |              |
|--------------|-------------|-------------|-------------|-------------|--------------|
| KIFDEILVNA   | KLQELNYNL   | KTWDQVPFS   | LLDGTATLRL  | LLMPAGVPL   | LMLGEFLKL    |
| KIFGSLAFL    | KLQQKEEQL   | KTWDQVPFSV  | LLDKAVSNVI  | LLMPAGVPLT  | LMLQNALTTM   |
| KIFSEVTLK    | KLQVFLIVL   | KTWDQVPFSVS | LLDRFLATV   | LLMWITQCF   | LMVLMALAL    |
| KILDAVVAQK   | KLSEGDLLA   | KTWGQYWQ    | LLDTNYNLF   | LLNAFTVTV   | LMWAKIGPV    |
| KINKNPKYK    | KLSEQESLL   | KTWGQYWQV   | LLDTNYNLFY  | LLNATIAEV   | LNIDLLWSV    |
| KIQEILTQV    | KLTQINFNM   | KVAELVHFL   | LLDVAPLSL   | LLNLPDKMFL  | LNIEKDDKL    |
| KIQRNLRTL    | KLVERLGAA   | KVAELVRFL   | LLDVPTAAV   | LLNLPVWVL   | LNLDPKMFL    |
| KIWEELSVLE   | KLVMSEQANV  | KVFGSLAFV   | LLEAPTGLV   | LLNQPDKMFL  | LPAVVGLSPGEQ |
| KIWEELSVLEV  | KLVVVGAVGV  | KVHPVIWSL   | LLEEMFLTV   | LLPENNVLSPV | LPGEVFAI     |
| KIYSENLKL    | KLYSENLKL   | KVIDQQNGL   | LLESAFPGLL  | LLPPLLEHL   | LPHAPGVQM    |
| KIYSENLKLA   | KLYSENLKLA  | KVLEFLAKL   | LLFETVMCDT  | LLQAEAPRL   | LPHNHTDL     |
| KIYSENLTL    | KLYSENLTL   | KVLEHVVRV   | LLFGLALIEV  | LLQDSVDFSL  | LPHSEITTL    |
| KIYSENLTLA   | KLYSENLTLA  | KVLEYVIK    | LLFLLQMMQI  | LLQEEEEEL   | LPHSSSHWL    |
| KLADQYPHL    | KMAAFPETL   | KVLHELFGMDI | LLFLLQMMQV  | LLQEYNWEL   | LPLLALLAL    |
| KLAEAERVGLHK | KMAELVHFL   | KVNIVPIAK   | LLFPYILPPKA | LLQGWVMYV   | LPMEVEKNSTL  |
| KLAKPLSSL    | KMDAEHPEL   | KVSAVTLAY   | LLFSFAQAV   | LLQLGYSGRL  | LPPLPPLDL    |
| KLATAQFKI    | KMFVKGAPDSV | KVVEFLAML   | LLGATCMFV   | LLQLYSGRL   | LPQKKSNAI    |
| KLCKVRKITV   | KMFVKGAPESV | KYDCFLHPF   | LLGCPVPLGV  | LLQMMQICL   | LPRWPPPQL    |
| KLCPVQLWV    | KMISAIPTL   | KYIQESQAL   | LLGDLFGV    | LLQMMQVCL   | LPSSADVEF    |
| KLDETGNSL    | KMLDHEYTT   | KYLATASTM   | LLGNCLPTV   | LLQVHHSCPL  | LQSRGYSSL    |
| KLDETGNSLK   | KMLKSFLKA   | KYKLSSSEL   | LLGPRPYR    | LLRGYHQDAY  | LRAGRSRRL    |
| KLDETGNSLVK  | KMNVFDTNL   | KYVGIEREM   | LLGPTVML    | LLSAEVQQHL  | LRRYLENGK    |
| KLDVGNAEV    | KMQASIEKA   | LAALPHSCL   | LLGRFELIGI  | LLSAVLPSV   | LSIGTGRAM    |
| KLEGLEDAL    | KMRRDLEEA   | LAAQERRVPR  | LLGRNSFEV   | LLSDDDVVV   | LSRLSNRLL    |
| KLFGSLAFV    | KMVELVHFL   | LALWGPDPAA  | LLHVHHSCPL  | LLSDEDVAL   | LTIGEFLK     |
| KLFGVLRK     | KMYAFTLES   | LAMPFATPM   | LLIADNPQL   | LLSDEDVALM  | LTIGEFLKL    |
| KLGDICIWYTL  | KMYAFTLESV  | LAPAKAVVYV  | LLIDLTSFL   | LLSDEDVALMV | LTITGGEWAV   |
| KLGDICIWYLS  | KNKRILMEH   | LASEKVYTI   | LLIDLTSFLL  | LLSDEDVEL   | LYNDFINK     |
| KLGDICIWYPS  | KPIVVLHGY   | LATEKSRWS   | LLIGATIQV   | LLSDEDVELM  | LYVVSFRNL    |
| KLIETYFSK    | KPQQKGLRL   | LATEKSRWSG  | LLIGATIQVT  | LLSDEDVELMV | LVALLAQLTV   |
| KLIGDPNLEFV  | KPRQSSPQL   | LAVDGVLVS   | LLIGATMQV   | LLSETVMCDT  | LVALLVCLTV   |
| KLIKDGILIRK  | KPSGATEPI   | LCGSHLVEAL  | LLIGATMQVT  | LLSGQPASA   | LVCGERGFFY   |
| KLKHYGPGWV   | KPSPPYFGL   | LDKVRALIE   | LLIGGFAGL   | LLSHGAVIEV  | LVFGIELMEV   |
| KLLDISELDMV  | KQDFSVPQL   | LEEKGNVY    | LLIKKLPRV   | LLSILCIWV   | LVFLAPAKAVV  |
| KLLEYIEEI    | KQDNSTYIMRV | LEEYNHQSL   | LLLDLLVSI   | LLSLFSLWL   | LVHFLLLKY    |
| KLLGPHVEGL   | KQLPEEKQPLL | LEKQLIEL    | LLLEAVPAV   | LLSPLHCWA   | LVLKRCLLH    |
| KLLGPHVLGV   | KQPAIMPQSY  | LYGQFVNYI   | LLLELAGVTHV | LLSPLHCWAV  | LVMAPRTVL    |
| KLLMVLMLA    | KQSSKALQR   | LYGQFVNYV   | LLLGIGILV   | LLSSGAFSA   | LVQENYLEY    |
| KLLQIQLCA    | KRIQEIIEQ   | LHHAFVDSIF  | LLGLPLGPL   | LLTSRLRFI   | LVVVGAVGV    |
| KLLQIQLCAKV  | KRTLKIPAM   | LIAHNQVRQV  | LLLGTIHAL   | LLTTLNLRV   | LWMRLLPLL    |
| KLLQIQLRA    | KSEMNVNMKY  | LIFDLGGGT   | LLLHCPSTV   | LLVALAIGCV  | LYATVIHDI    |
| KLLQIQLRAKV  | KSLNYSQVK   | LIFDLGGGTDF | LLLDVAPL    | LLVSEIDWL   | LYAWEPSFL    |
| KLLSSGAFSA   | KSMNANTITK  | LIYDSSLCDL  | LLLLTVLTV   | LLWWIAVGPV  | LYLVCGERGF   |
| KLMPDRTAV    | KTCPVQLWV   | LIYRRRLMK   | LLLPAEVQQHL | LLYKLADLI   | LYSACFWWL    |
| KLMSPKLYVW   | KTIHLTLKV   | LKLSGVVRL   | LLLALAGA    | LMAGCIEA    | LYSDPADYF    |
| KLNPATFML    | KTLGKLWRL   | LLAAVAALL   | LLLPGPSAA   | LMALPPCHAL  | LYVDSLFFL    |
| KLPNSVLGR    | KTLTSVFQK   | LLAGIGTVPI  | LLLRSPAGV   | LMASSTSI    | LYVDSLFFLc   |
| KLQAPVQEL    | KTPFVSPLL   | LLAGPPGV    | LLLSAEVQQHL | LMETHLSSK   | MALENNYEV    |
| KLQATVQEL    | KTVDLILEL   | LLASSMSSQL  | LLMEGVPKSL  | LMFWSPSHSCA | MAQKRIHAL    |
| KLQEELNKV    | KTVNELQNL   | LLDSSLVSI   | LLMEKEDYHSL | LMGDKSENV   | MAVPPCCIGV   |

Table S2 continued

|             |             |              |             |              |             |
|-------------|-------------|--------------|-------------|--------------|-------------|
| MEGEVWGL    | NLFDTAEVYA  | PLTSIISAV    | RAPPTTPAL   | RLLYPDYQI    | RTFHHGVRV   |
| MEIFIEVFSHF | NLFDTAEVYAA | PPSACSPRF    | RASHPIVQK   | RLMKQDFS     | RTGEVKWSV   |
| MEKEDYHSL   | NLFETPVEA   | PTLDKVLEL    | RAYQQALS    | RLNAALREK    | RTIAPPIGR   |
| MEVDPIGHLY  | NLFLFLFAV   | PTLDKVLEV    | RHELTVSL    | RLPRIFCSC    | RTIPTPLQPL  |
| MFPEVKEKG   | NLIKLAQKV   | QCSGNFMGF    | RELEETNQKL  | RLQGISPKI    | RTKQLYPEW   |
| MGNIDSINCK  | NLKLKLSHF   | QFITSTNTF    | REPVTKAEML  | RLQREWHTL    | RTLAEIAKV   |
| MIAVFLPIV   | NLLDSLEQYI  | QGQHFLQKV    | REQFLGALDL  | RLQTPMQVGL   | RTLDKVLEV   |
| MIHDLCLAFPA | NLLEREFGA   | QIAKGMSYL    | RESEEEVSL   | RLQVPVEAV    | RTNWPNTGK   |
| MIHDLCLVFL  | NLLGRFELI   | QIEGLKEEL    | RFEKHAHYF   | RLRAPEVFL    | RTTEINFKV   |
| MIMQGGFSV   | NLLGRFELIGI | QILKGGSGT    | RFKMFEVK    | RLRPLCCTA    | RVFQGGFTGR  |
| MLAVISCAV   | NLPDKMFLPGA | QILPLHGPEA   | RIAECILGM   | RLSCPSRA     | RVHAYIISY   |
| MLGDPVPTPT  | NLQGSPVYV   | QIRPIFSNR    | RIDITLSSV   | RLSCSSRA     | RVKAPNKSL   |
| MLGHTHMEV   | NLSALGIFST  | QLARQQVHV    | RIGQRQETV   | RLSSCVPVA    | RVLRQVEAAPL |
| MLLAVLYCL   | NLSSAEVVV   | QLCAKVPLL    | RIKDFLRNL   | RLTSTNPTM    | RVLRQVEEAPL |
| MLLDKNIPI   | NLVRDDGSAV  | QLCPICRAPV   | RILGPGLNK   | RLTSTNPTT    | RVPGVAPTL   |
| MLLKTSEFL   | NLWDLTDASVV | QLEERTWLL    | RILMEHIHKLK | RLVDDFLLV    | RVQEAESMVK  |
| MLLSVPLLLG  | NLYPFVKTV   | QLFEDNYAL    | RINEFSISSF  | RLVELAGQSLLK | RVRFFFFPSL  |
| MLMAQEALAF  | NMQDLVEDL   | QLFNHTMFI    | RIVQRIKDF   | RLWQELSD     | RVSLPTSPR   |
| MLPSQPTLL   | NMVAKVDEV   | QLFNKHTMFI   | RLAEYQAYI   | RLWTTTRPRV   | RVTSIRLFEV  |
| MLTNSCVKL   | NPATPASKL   | QLGPTCLSSL   | RLARLALVL   | RLYDEKQQHI   | RVWDLPGVLK  |
| MLVGGSTLCV  | NPIVVFHGY   | QLGPGVGVF    | RLASFYDWLP  | RLYDEKQQHIVY | RWPSCQKKF   |
| MLWSCTFCRI  | NPKAFFSVL   | QLGRISLLL    | RLASSVLRGCK | RLYEMILKR    | RYAMTVWYF   |
| MLWSCTFCRM  | NSELSCQLY   | QLIMPGQEA    | RLASYLDKV   | RLYPWGVVEV   | RYCNLEGPPI  |
| MLYYPVSVR   | NSQPWWLCL   | QLLALLPSL    | RLDFNLIRV   | RMFPNAPYL    | RYGSFSVTL   |
| MMKMMCIKDL  | NTDSPLRY    | QLLDGFMITL   | RLDQLLRHV   | RMLPHAPGV    | RYMPPAHRNF  |
| MMLPSQPTL   | NTYASPRFK   | QLLDQVEQI    | RLFAFVRFT   | RMMEYGTTMV   | RYQLDPKFI   |
| MMLPSQPTLL  | NTYASPRFKf  | QLLIKAVNL    | RLFFYRKS    | RMMLPSQPTL   | RYQQWMERF   |
| MMLPSQPTLLT | NVIRDAVTY   | QLLKLNVPA    | RLFVGSIPK   | RMPEAAPV     | SACDVSVRV   |
| MMLPSRPTL   | NVLHFFNAPL  | QLLNSVLT     | RLGGAALPRV  | RMTDQEAIQ    | SACDVSVRVV  |
| MMLPSRPTLL  | NVMPVLDQSV  | QLMAFNHLV    | RLGLQVRKNK  | RMTDQEAIQDL  | SAFPTTINF   |
| MMLPSRPTLLT | NYARTEDFF   | QLQGLQHNA    | RLGNSLLLK   | RNGYRALMDKS  | SAGPPSLRK   |
| MMQICLHHL   | NYKHCPEI    | QLSLLMWIT    | RLGPTLMCL   | RPHVPESAF    | SASVQRADTSL |
| MMQVCLHHL   | NYKRCFPVI   | QLSSGVSEIRH  | RLGPVARTRV  | RPKSNIVL     | SAWISKPPGV  |
| MMSEGGPPGA  | NYNNFYRFL   | QLVFGIEVV    | RLIDLGVGL   | RPKSNIVLL    | SAYGEPRKL   |
| MMYKDILL    | NYSVRYRPL   | QLVIQCEPL    | RLIGDAAKNQV | RQAGDFHQV    | SEHLDTQKELL |
| MPFATPMEA   | PAFSYSFFV   | QLYALPCVL    | RLLASLQDL   | RQFVTQLY     | SEIWRDIDF   |
| MPFATPMEAEL | PLADLSPFA   | QMFFCFKEL    | RLLCALTSL   | RQKKIRIQL    | SEIWRDIDFd  |
| MPGEATETV   | PLALEGSLQK  | QMMQICLHHL   | RLLDLAQEGL  | RQKRILVNL    | SELFRRGLDSY |
| MQLIYDSSL   | PLDGGVAAA   | QMMQVCLHHL   | RLLIKKLPRV  | RQLAQEQFFL   | SESIKKKVL   |
| MSLQRQFLR   | PLFDFSWLSL  | QQITKTEV     | RLLKEYQEL   | RQVGDHFQV    | SESLKMIF    |
| MTSALPIIQK  | PLFQVPEPV   | QQLDSKFLEQV  | RLLPLLALL   | RRFFPYVY     | SFSYTLISL   |
| MTVDSLNVK   | PLHCWAVLL   | QRPYGYDQIM   | RLLPLLALLAL | RRKWRRWHL    | SGMGSTVSK   |
| MVIGIPVYV   | PLHCWVLL    | QVFPGLLERV   | RLLPLWAAL   | RRQRRSRRL    | SHETVIIEL   |
| MVKISGGPR   | PLLALLALWG  | QVLDLRLPSGV  | RLLPLWAALPL | RRRWHRWRL    | SHLVEALYLV  |
| MVWESGCTV   | PLENVISK    | QYSWFVNGTF   | RLLQETELV   | RSCGLFQKL    | SIFDGRVVAK  |
| MVYDLYKTL   | PLPEAPLSL   | RAGLQVRKNK   | RLLSDEDVAL  | RSDSGQQARY   | SIFTWAGKAVL |
| MYIFPVHWQF  | PLPPARNGGL  | RALAETSYY    | RLLSDEDVALM | RSKFRQIV     | SIFTWAGQAVL |
| NCLKLLES    | PLPPARNGGLg | RALAKLLPL    | RLLSDEDVEL  | RSRRVLYPR    | SILEDPPSI   |
| NLAQDLATV   | PLQPEQLQV   | RALEEANADLEV | RLLSDEDVELM | RSYHLQIVTK   | SIQNYHPFA   |
| NLATYMNSI   | PLTEYIQPV   | RALRLTAFASL  | RLLVPTQFV   | RSYVPLAHR    | SISVLISAL   |

Table S2 continued

|              |             |             |             |              |              |
|--------------|-------------|-------------|-------------|--------------|--------------|
| SIVKIQSWFRM  | SLMSWSAIL   | SQGFSHSQM   | THFPDETEI   | TMTRVLQGV    | VLHDDLLE     |
| SLAAGVKLL    | SLNYSGVKEL  | SQKTYQGSY   | TIADFWQMV   | TPGNRAISL    | VLHDDLLEA    |
| SLAAYIPRL    | SLPGGTAS    | SQLTTLSEFY  | TIHDSIQYV   | TPNQRQNVG    | VLHELFGMDI   |
| SLADEAEVYL   | SLPKHSVTI   | SQQAQLAAA   | TILLGIFFL   | TPRLPSSADVEF | VLHWDPETV    |
| SLADTNLAV    | SLPPPGRTRV  | SRASRALRL   | TIMHDLCLA   | TPRTPPPQ     | VLLSAFPGGL   |
| SLADTNLAVV   | SLPRGTSTPK  | SRDSRGKPGY  | TINPQVSKT   | TQPGPLAPL    | VLLSAFPGRL   |
| SLAMLDLLHV   | SLQALKVTV   | SRFGGAVVR   | TIPTLQPL    | TQPGPLVPL    | VLLGMEGSV    |
| SLASLLPHV    | SLQDVPLAAL  | SRFTYTALK   | TIRYPDPVI   | TRPWSGPYIL   | VLLLVLAVG    |
| SLAVVSTQL    | SLQEEIAFL   | SSADVEFCL   | TLADFDPRV   | TRVLAMAIY    | VLLQAGSLHA   |
| SLCPWSWRAA   | SLQEKVAKA   | SSDNYEHWLY  | TLAKYLMEL   | TSALPIIQK    | VLLRHSKNV    |
| SLDDYNHLV    | SLQKRGIVEQ  | SSDYVIPIGTY | TLDEKVAELV  | TSDQLGYSY    | VLMIKALEL    |
| SLDDYNHLVTL  | SLQPLALEG   | SSFGRGFFK   | TLDSQVMSL   | TSEHSHFSL    | VLNSLASLL    |
| SLDKDIVAL    | SLQRMVQEL   | SSKALQRPV   | TLDWLLQTPK  | TSEKRPFMCAY  | VLNSVASLL    |
| SLEEEIRFL    | SLQRTVQEL   | SSLSLFFRK   | TLEEITGYL   | TSTTSLELD    | VLDPVFIRC    |
| SLEENIVIL    | SLQSMVQEL   | SSPGCQPPA   | TLEGFASPL   | TTINYTLWR    | VLDPVFIRCV   |
| SLFEGIDIYT   | SLQSTVQEL   | SSSGLHPPK   | TLGEFLKL    | TTLITNLSSV   | VLDPVFIRCV   |
| SLFEGVDFYT   | SLRILYMTL   | SSVPGVRL    | TLITDGMRSV  | TTNAIDELK    | VLQELNVTV    |
| SLFGKLLQL    | SLSKILDTV   | STALRLTAF   | TLKCDCEIL   | TVASRLGPV    | VLQVGLPAL    |
| SLFLGILSV    | SLSPLQAEI   | STAPPAHGV   | TLKKYFIPV   | TVFDAKRLIGR  | VLQWLPDNRL   |
| SLFPNSPKWTSK | SLSRFSWGA   | STAPPVHNV   | TLLASSMSSQL | TVSGNILTIR   | VLQWLSDNRL   |
| SLFRAVITK    | SLVEELKKV   | STDPQHHAY   | TLLIGATIQV  | TYACFVSNL    | VLRDDLLEA    |
| SLFVSNHAY    | SLWGGDVVL   | STIKFQMKK   | TLLIGATIQVT | TYLPTNASL    | VLRENTSPK    |
| SLGEQQYSV    | SLWSSSPMA   | STLCQVEPV   | TLLIGATMQV  | TYSEKTTLF    | VLRKEEEKL    |
| SLGIMAIEL    | SLWSSSPMAT  | STLQGLTSV   | TLLIGATMQVT | VAANIVLTV    | VLRQEVAAPL   |
| SLGSPVLGL    | SLWSSSPMATT | STMPHTSGMNR | TLLLEGVMAA  | VAELVHFL     | VLNVNVPDV    |
| SLGWLFLL     | SLYHVYEVNL  | STPPPGATRV  | TLLNLPDKMFL | VAVKAPGFGD   | VLTSSEMHV    |
| SLIAAAAFCLA  | SLYKFSPPFL  | STSQEIHSATK | TLLNQPKMFL  | VCGERGFY     | VLVEGSTRI    |
| SLIKQIPRI    | SLYQLENYC   | STVASRLGPV  | TLLPATMNI   | VCLHHLPFWI   | VLVPPLPSL    |
| SLKLESITPI   | SLYSFPEPEA  | STVASWLGVP  | TLLSNIQGV   | VEETPGWPTTL  | VLWDRFTSL    |
| SLLDRFLATV   | SMCRFSPLTL  | SVAQQLNGK   | TLMSAMTNL   | VEGSGELFRW   | VLYGPDAPT    |
| SLLGLALLAV   | SMLIRNNFL   | SVASLLPHV   | TLPGYPPHV   | VEIEERGVKL   | VLYPRVRR     |
| SLLGQLSGQV   | SMPPPGRTRV  | SVASTITGV   | TLPPAWQPFL  | VFLPCDSWNL   | VLYRYGSFSV   |
| SLLKFLAKV    | SMPQGTFPV   | SVGSVLLTV   | TLPPRPDHI   | VIMPCSWWV    | VLYRYGSFSVTL |
| SLLLEEEV     | SMSKEAVAI   | SVHSLHIWSL  | TLRTGEVKWSV | VISNDVCAQV   | VMALENNYEV   |
| SLLMWITQA    | SMSSQLGRISL | SVKPASSSF   | TLSSRVCCRT  | VIVMLTPLV    | VMIIVSSLAV   |
| SLLMWITQC    | SNDGPTLI    | SVPQLPHSSHW | TLTNIAMRPGL | VIWEVNAV     | VMLDKQKEL    |
| SLLMWITQCFL  | SPASSRTDL   | SVQGIIYR    | TLTTGEWAV   | VLAGGFFLL    | VMNILLQYV    |
| SLLNLPVWV    | SPAVDKAQAEI | SVSPVVHVR   | TLWVDPYEV   | VLAGVGFFI    | VMNILLQYVV   |
| SLLNLPVWVLM  | SPGSGFWSF   | SVVKIQSWFRM | TLYEAVREV   | VLASIEAEL    | VPGWGIAL     |
| SLLPAIVEL    | SPHPVTALL   | SVYDFVWV    | TLYNPERTITV | VLASIEAELPM  | VPLDCVLYRY   |
| SLLQHLIGL    | SPLFQRSSL   | SYLDKVR     | TMASTSVSRSA | VLASIEPEL    | VPRSAATTL    |
| SLLQSREYSSL  | SPQNLRNLT   | SYLDSGIHF   | TMESMNGGKLY | VLASIEPELPM  | VPYGSFKHV    |
| SLLQSRGYSSL  | SPRFSPITI   | SYRNEIAYL   | TMGGYCGYL   | VLCSIDWFM    | VRIGHLYIL    |
| SLLSGDWVL    | SPRPPLGSSL  | SYTRLFLIL   | TMHSLTIQM   | VLDLRLPSGV   | VRGLSLSTK    |
| SLLSLPVWV    | SPRWVPTCL   | TALRLTAFASL | TMKIYSENLT  | VLDGLDVLL    | VRSRRLRRL    |
| SLLSLPVWVLM  | SPSKAFASL   | TCQPTCRSL   | TMKLYSENLT  | VLEGMEV      | VSDFGGRSL    |
| SLLSPLHCWA   | SPSSNRIRNT  | TEAASRYNL   | TMLARLASA   | VLFGLGFAI    | VLSLSPVWV    |
| SLLSPLHCWAV  | SPSVDKARAEI | TETEAIHVF   | TMLGRRAPI   | VLFSSDFRI    | VTLIGATIQV   |
| SLLTSSKGQLQK | SPTSSRTSSL  | TFDYLRVSVL  | TMLGRRPPI   | VLFYLGQY     | VTLIGATMQV   |
| SLMASSPTSI   | SQFGGGSQY   | TFPDLESEF   | TMNGSKSPV   | VLFYLGQYI    | VTTDIQVKV    |

*Table S2 continued*

|             |              |             |
|-------------|--------------|-------------|
| VVEGTAYGL   | YLDPAQQNL    | YVDPVITSI   |
| VVHFFKNIV   | YLEPGPVTA    | YVFTLLVSL   |
| VVLGVVFGI   | YLEYRQVPV    | YVIPIGTYGQM |
| VVMSWAPPV   | YLFSEEITSG   | YYNAFHWAI   |
| VVMVNQGLTK  | YLGSYGFRL    | YYSVRDTLL   |
| VVPCEPPEV   | YLIELIDRV    | YYWPRPRRY   |
| VVPEDYWGV   | YLLKPVQRI    | RVASPTSGVK  |
| VVQNFAKEFV  | YLLLRVLNI    |             |
| VVTGVLVYL   | YLLPAIVHI    |             |
| VVVGAVGVG   | YLLPEAEEI    |             |
| VYDFFVWLHY  | YLLQGMIAAV   |             |
| VYDYNCHVDL  | YLMDTSGKV    |             |
| VYFFLPDHL   | YLNHLEPWI    |             |
| VYGIRLEHF   | YLNKEIEEA    |             |
| VYLDKFIRL   | YLQGMIAAV    |             |
| VYSDADIFL   | YLQLVFGIEV   |             |
| VYVKGLLAKI  | YLQQNTHTL    |             |
| WATLPLLCAR  | YLSGANLNL    |             |
| WGPDPAAA    | YLSGANLNLG   |             |
| WLDEVKQAL   | YLSGANLNV    |             |
| WLDPNETNEI  | YLVGNVCIL    |             |
| WLEYYNLER   | YLVPPQQGFFC  |             |
| WLLPLWAAL   | YLYDRLLRI    |             |
| WLLPLWAALPL | YLYGQTTY     |             |
| WLPFGFILI   | YMDGTMSQV    |             |
| WLPKILGEV   | YMFVTSRV     |             |
| WLQYFPNPV   | YMFNPAPYL    |             |
| WLSLKTLLSL  | YMIAHITGL    |             |
| WLSLLFKKL   | YMIDPSGVSY   |             |
| WMRLLPLLAL  | YMIMVKCWMI   |             |
| WQYFFPVIF   | YMIPSIRNSI   |             |
| WYEGLDHAL   | YMMPVNSEV    |             |
| WYQTKYEEL   | YMNGTMSQV    |             |
| YAVDRAITH   | YMNSIRLYA    |             |
| YEDIHGTLHL  | YPFKPPKV     |             |
| YEGSPIKVTL  | YQGSYGFRL    |             |
| YGHSGQASGLY | YQLDPKFIV    |             |
| YGYDNVKEY   | YRPRPRRY     |             |
| YIDEQFERY   | YRYGSFSVTL   |             |
| YIFAVLLVCV  | YSDHQPSGPYY  |             |
| YIGEVLSV    | YSLEYFQFV    |             |
| YLAMPFATPME | YSLKLIKRL    |             |
| YLAPENGYL   | YSWMDISCWI   |             |
| YLCDKVIPG   | YTCPLCRAPV   |             |
| YLCDKVVPV   | YTDHFHCQYV   |             |
| YLCSSSYF    | YTDVFG EGL   |             |
| YLCSSSYFV   | YTDQPSTSQIAY |             |
| YLDLFGDPSV  | YTLDRDSLIV   |             |
| YLDLLFQIL   | YTMKEVLFY    |             |
| YLDLLFQILL  | YVDFREYEYY   |             |

**Table S3.** Custom library of tumor associated antigen source proteins.

|          |          |         |         |          |          |
|----------|----------|---------|---------|----------|----------|
| ABCA1    | BING4    | CLTC    | DUSP22  | GNTK     | IMP3     |
| ABCA6    | BIRC5    | CLYBL   | EEF2    | GPC3     | INPP5D   |
| ABCC3    | BIRC7    | CML28   | EFTUD2  | GPCPD1   | INS      |
| ABCD3    | BIRC8    | CNMD    | EGFR    | GPNMB    | INSM2    |
| ABL1     | BIRC9    | COA1    | EHD2    | GPR143   | INTS11   |
| ACPP     | BRAF     | COL2A1  | EIF2S3  | HAO2     | INTS13   |
| ACRBP    | BST2     | COL4A3  | EIF3D   | HAUS3    | IQGAP2   |
| ACTB     | BTBD2    | COL6A2  | ELAC2   | HBD      | IRS2     |
| ACTN4    | BTG1     | CORO1A  | ELAVL1  | HCG      | ITGAL    |
| ADAM17   | BTK      | COX2    | ELAVL4  | HDAC1    | ITGAM    |
| ADAMTSL5 | C18orf21 | CPSF    | EML6    | HDGF     | ITGB2    |
| ADRP     | C2CD4A   | CPSF1   | ENAH    | HEPACAM  | ITGB8    |
| AFP      | C5       | CPVL    | EPCAM   | HHAT     | KAAG1    |
| AIM2     | CA9      | CR2     | EPHA2   | HIFPH3   | KCNAB1   |
| AIMP1    | CACNG    | CRABP1  | ERAP1   | HIST4H4  | KDM2B    |
| AKAP13   | CADH3    | CRNKL1  | ERBB2   | HIVEP1   | KDM5B    |
| ALDH1A1  | CALCA    | CSAG2   | ERVK3-1 | HLA-A    | KDM5C    |
| ALDOA    | CALR     | CSF1    | ETV5    | HLA-B    | KDM5D    |
| ALK      | CAMP     | CSF3R   | EVI2B   | HLA-DOB  | KDR      |
| ALYREF   | CASP5    | CSNK1A1 | EZH2    | HLA-DPA1 | KIAA1551 |
| AML1     | CASP8    | CSPG4   | EZR     | HMMR     | KIF20A   |
| AMZ2     | CCDC110  | CT83    | FAM136A | HMOX1    | KLK10    |
| ANKRD30A | CCL3     | CTAG1A  | FASN    | HMSD     | KLK3     |
| ANO7     | CCL3L1   | CTDP1   | FBXW11  | HNF4G    | KLK4     |
| ANXA1    | CCLA2    | CTNNB1  | FCER1A  | HNRNPL   | KRAS     |
| APOBEC3H | CCNA1    | CTPS1   | FDPS    | HNRNPLL  | KRI1     |
| ARF1     | CCNB1    | CTSH    | FGF5    | HNRNPR   | KRT16    |
| ARHGAP15 | CCND1    | CYP1B1  | FGF6    | HOXD3    | KRT18    |
| ARHGAP25 | CCNI     | CYP21A2 | FLT3    | HPN      | KRT6C    |
| ARHGAP4  | CD19     | CYP2A6  | FLT3LG  | HPSE     | KTN1     |
| ARHGAP45 | CD274    | CYP2A7  | FMOD    | HSDL1    | LAGE1    |
| ARL4D    | CD33     | CYP2C8  | FMR1NB  | HSP90AB1 | LAGE3    |
| ART4     | CD48     | CYP2C9  | FNDC3B  | HSPA1A   | LAS1L    |
| ART5     | CD69     | CYP2D6  | FOLH1   | HSPA1B   | LCK      |
| ASH1L    | CD79B    | CYPB    | FOXO1   | HSPA1L   | LCP2     |
| ATIC     | CDC5L    | DAPK2   | G3BP1   | HSPA6    | LGALS1   |
| ATP2A3   | CDCA7L   | DCT     | G6PC2   | HSPB1    | LGALS3BP |
| ATXN10   | CDH13    | DDX21   | GAD2    | HSPD1    | LGSN     |
| B2A2     | CDK12    | DDX3Y   | GAGE1   | ICAM3    | LPGAT1   |
| B3A2     | CDK4     | DDX5    | GAS7    | ICE      | LRMP     |
| BA46     | CDKN1A   | DKK1    | GATA2   | IDNK     | LRRC8A   |
| BAD      | CDKN2A   | DLAT    | GC      | IDO1     | LTB      |
| BAGE1    | CDR2     | DMD     | GCGR    | IER3     | LY6K     |
| BCAP31   | CEACAM5  | DMXL1   | GEMIN4  | IFG2BP3  | LYN      |
| BCHE     | CELF6    | DNAJC2  | GFAP    | IFI30    | MAG      |
| BCL2     | CELSR1   | DNMBP   | GIN51   | IFI6     | MAGEA1   |
| BCL2A1   | CENPM    | DNMT1   | GLRX3   | IGF2BP2  | MAGEA12  |
| BCL2L4   | CEP55    | DOCK2   | GLS     | IGF2BP3  | MAGEB2   |
| BFAR     | CLCA2    | DOK2    | GNAO1   | IL13RA2  | MAGEC1   |
| BID      | CLP      | DSE     | GNL3L   | IL2RG    | MAGEC2   |



Table S3 continued

|          |         |          |          |         |
|----------|---------|----------|----------|---------|
| MAGEC2   | NELFA   | PSMB1    | SIRT2    | UBE2C   |
| MAGED2   | NFYC    | PSMB10   | SLC25A5  | UBE2D2  |
| MAGEE1   | NISCH   | PTHLH    | SLC30A8  | UGT2B17 |
| MAGEF1   | NLRP5   | PTPN11   | SLC41A3  | UQCR10  |
| MAGEF1   | NOB1    | PTPN21   | SLC45A2  | UQCRH   |
| MALL     | NONO    | PTPRC    | SLC45A3  | USP11   |
| MAP4K1   | NPM1    | PTPRN    | SLCO2A1  | USP9X   |
| MARK3    | NQO1    | PTTG1IP  | SNRNP70  | USP9Y   |
| MATN2    | NRAS    | PUM3     | SNRPD1   | UTY     |
| MBP      | NUDCD1  | PWWP3A   | SNX14    | VEGFA   |
| MC1R     | NUF2    | PXDN     | SOX10    | VENTXP1 |
| MCF2     | NUF3    | RAB38    | SP110    | VGf     |
| MCM5     | NUP210  | RAN      | SPA17    | VIM     |
| MCMBP    | NUP37   | RASGRF1  | SPARC    | VIPR1   |
| MDK      | OCA2    | RASGRP2  | SPATA5L1 | VPS13B  |
| MDM2     | OGT     | RASSF10  | SSX1     | VSIG10L |
| MDN1     | OS9     | RBAF600  | SSX2     | WNK2    |
| ME1      | P2RX5   | RBBP4    | STAT1    | WT1     |
| MED23    | PAK2    | RBL2     | STEAP1   | XAGE1B  |
| MED24    | PARP10  | RFA1     | SUGT1    | XBP1    |
| MET      | PARP3   | RGS5     | SUPT5H   | ZFAND5  |
| METTL21A | PASD1   | RHOC     | SYNGR1   | ZFHx3   |
| MFGE8    | PAX3    | RINT1    | TAG1     | ZFP36L1 |
| MICA     | PAX5    | RNF19B   | TALDO1   | ZFY     |
| MLANA    | PCDH11Y | RNF43    | TBC1D22A | ZMYM4   |
| MMP2     | PCDH20  | RPA1     | TCHH     | ZNF395  |
| MMP7     | PDGFRA  | RPL10A   | TEK      |         |
| MOK      | PFKM    | RPL19    | TEP1     |         |
| MPL      | PGK1    | RPS2     | TERT     |         |
| MRPL19   | PHB     | RPS4Y1   | TG       |         |
| MS4A1    | PHRF1   | RPSA     | TGRBR2   |         |
| MSCP     | PIM1    | RUBCNL   | THEM6    |         |
| MSLN     | PLAC1   | SAGE1    | TMCO1    |         |
| MT-ATP6  | PLIN2   | SART1    | TMED4    |         |
| MT-CO2   | PLP1    | SART3    | TMSB10   |         |
| MTRR     | PMEL    | SASH1    | TMSB4Y   |         |
| MUC1     | POP1    | SCGB2A2  | TOP1     |         |
| MUC16    | PP2A    | SCGB2A7  | TOP2A    |         |
| MUC5AC   | PPFIBP1 | SCRN1    | TP53     |         |
| MUM2     | PPIB    | SEC31A   | TP53I11  |         |
| MUM3     | PPP1R3B | SELL     | TPBG     |         |
| MYH1     | PRAME   | SELPLG   | TPO      |         |
| MYH2     | PRDM1   | SEPT2    | TRIM22   |         |
| MYH9     | PRDX2   | SEPT6    | TRIM68   |         |
| MYO1G    | PRDX5   | SERPINB5 | TTK      |         |
| N4BP2    | PRELID1 | SF1      | TTN      |         |
| N4BP2L1  | PRKCB   | SFMBT1   | TYMS     |         |
| NACA2    | PRTN3   | SGT1B    | TYR      |         |
| NCF4     | PSD4    | SH3GLB2  | TYRP1    |         |
| NECTIN4  | PSMA3   | SIRPD    | UBD      |         |

**Table S4.** CLX treatment groups and dosing schedule. Groups 6 and 7 were not included in SKMEL2/IPC298 studies (*NRAS* mutant).

| <b>Study groups</b>                 | <b>Schedule</b>     | <b>Route</b> |
|-------------------------------------|---------------------|--------------|
| 1. Vehicle (1%CMC/0.5%Tween80)      | BID1-3, 2hr         | PO           |
| 2. 3.5 mg/kg MEK162                 | QD, 2hr             | PO           |
| 3. 3.5 mg/kg MEK162                 | BID1-2, 2hr         | PO           |
| 4. 3.5mg/kg MEK162                  | BID1-3, 2hr         | PO           |
| 5. 3.5mg/kg MEK162                  | BID1-5, 2hr         | PO           |
| 6. 20mg/kg LGX818                   | QD1-3, 2hr          | PO           |
| 7. 3.5 mg/kg MEK162/ 20mg/kg LGX818 | BID1-3, 2hr / QD1-3 | PO           |
